# Supplementary material for: Injury patterns in a large-scale ski resort in the host city of 2022 Winter Olympic Games: a retrospective cross-sectional study
Source: PubMed Central journal article supplement — BMJ Open. 2020 Nov 23;10(11):e037834. doi: 10.1136/bmjopen-2020-037834 (PMC7684805; doi:10.1136/bmjopen-2020-037834), 2020-11-23
Supplement: bmjopen-2020-037834.draft_revisions.pdf [file bmjopen-2020-037834.draft_revisions.pdf]

# BMJ Open

BMJ Open is committed to open peer review. As part of this commitment we make the peer review history of every article we publish publicly available.

When an article is published we post the peer reviewers' comments and the authors' responses online. We also post the versions of the paper that were used during peer review. These are the versions that the peer review comments apply to.

The versions of the paper that follow are the versions that were submitted during the peer review process. They are not the versions of record or the final published versions. They should not be cited or distributed as the published version of this manuscript.

BMJ Open is an open access journal and the full, final, typeset and author-corrected version of record of the manuscript is available on our site with no access controls, subscription charges or pay-per-view fees (<http://bmjopen.bmj.com>).

If you have any questions on BMJ Open's open peer review process please email [info.bmjopen@bmj.com](mailto:info.bmjopen@bmj.com)

# BMJ Open

## Injury pattern in a Chinese ski resort in the host city of 2022 Winter Olympic Games

|                               |                                                                                                                                                                                                                |
|-------------------------------|----------------------------------------------------------------------------------------------------------------------------------------------------------------------------------------------------------------|
| Journal:                      | <i>BMJ Open</i>                                                                                                                                                                                                |
| Manuscript ID                 | bmjopen-2020-037834                                                                                                                                                                                            |
| Article Type:                 | Original research                                                                                                                                                                                              |
| Date Submitted by the Author: | 20-Feb-2020                                                                                                                                                                                                    |
| Complete List of Authors:     | Chen, Nayun; Peking University Third Hospital, Institute of Sports Medicine<br>Yang, Yuping; Peking University Third Hospital, Institute of Sports Medicine<br>Ao, Yingfang; Peking University Third Hospital, |
| Keywords:                     | SPORTS MEDICINE, PUBLIC HEALTH, Orthopaedic sports trauma < ORTHOPAEDIC & TRAUMA SURGERY                                                                                                                       |
|                               |                                                                                                                                                                                                                |

SCHOLARONE™  
Manuscripts

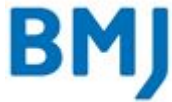

I, the Submitting Author has the right to grant and does grant on behalf of all authors of the Work (as defined in the below author licence), an exclusive licence and/or a non-exclusive licence for contributions from authors who are: i) UK Crown employees; ii) where BMJ has agreed a CC-BY licence shall apply, and/or iii) in accordance with the terms applicable for US Federal Government officers or employees acting as part of their official duties; on a worldwide, perpetual, irrevocable, royalty-free basis to BMJ Publishing Group Ltd ("BMJ") its licensees and where the relevant Journal is co-owned by BMJ to the co-owners of the Journal, to publish the Work in this journal and any other BMJ products and to exploit all rights, as set out in our [licence](#).

The Submitting Author accepts and understands that any supply made under these terms is made by BMJ to the Submitting Author unless you are acting as an employee on behalf of your employer or a postgraduate student of an affiliated institution which is paying any applicable article publishing charge ("APC") for Open Access articles. Where the Submitting Author wishes to make the Work available on an Open Access basis (and intends to pay the relevant APC), the terms of reuse of such Open Access shall be governed by a Creative Commons licence – details of these licences and which [Creative Commons](#) licence will apply to this Work are set out in our licence referred to above.

Other than as permitted in any relevant BMJ Author's Self Archiving Policies, I confirm this Work has not been accepted for publication elsewhere, is not being considered for publication elsewhere and does not duplicate material already published. I confirm all authors consent to publication of this Work and authorise the granting of this licence.

1  
2  
3  
4 1 Injury pattern in a Chinese ski resort in the host city of 2022 Winter

5  
6  
7 2 Olympic Games

8  
9 3 Chen Nayun<sup>1\*</sup>, Yang Yuping<sup>1\*</sup>, Ao Yingfang<sup>1</sup>

10  
11  
12 4 1. Peking University Third Hospital, Peking University Institute of Sports

13  
14 5 Medicine

15  
16  
17 6 \* They contribute equally to this article.

18  
19  
20 7 Corresponding Arthur: Ao Yingfang

21  
22 8 E-mail: [aoyingfang@163.com](mailto:aoyingfang@163.com)

23  
24  
25 9 Running title: Injury pattern in Chinese ski resort

26  
27 10 Word Count : 3323

28  
29  
30 11

31  
32  
33 12

34  
35  
36 13

37  
38  
39 14

40  
41  
42 15

43  
44  
45 16

46  
47  
48 17

49  
50  
51 18

52  
53  
54 19

55  
56  
57 20

58  
59  
60 21

22

1  
2  
3  
4 23 Abstract

5  
6 24 Objective: This study is to investigate the current injury pattern in  
7  
8  
9 25 skiing/snowboarding population in China, and to provide evidence for better  
10  
11  
12 26 practice in mountainside hospital near ski resort.

13  
14 27 Design: A retrospective cohort study

15  
16  
17 28 Methods: A retrospective study was performed in WanLong Ski Resort in  
18  
19  
20 29 ChongLi. The data of all injured skiers and snowboarders seen in the clinic of  
21  
22  
23 30 Wanlong Ski Resort in season 2018-2019 was collected. Patients information  
24  
25 31 including gender, age, equipment, ski level, injury type was analyzed.

26  
27 32 Results: A total of 753 sports injuries were recorded. The estimated incidence  
28  
29  
30 33 of injury was 1.94 per 1000 skier days. 453 cases (60.2%) were associated with  
31  
32  
33 34 skiing. The mean age of skiers was older than snowboarders ( $35.1\pm 14.5$  vs.  
34  
35 35  $29.0\pm 8.9$ ,  $p<0.01$ ). Self-inflicted accident took up 67.9% of all injuries. The most  
36  
37  
38 36 common type of injury in skiers was lower extremity injuries; while in  
39  
40  
41 37 snowboarders, it was upper extremity injuries. Head and cervical injury was  
42  
43 38 identified in 13.7% of skiers and 13.6% of snowboarders.

44  
45 39 Conclusion: The incidence of skiing/snowboarding injury in China is similar to  
46  
47  
48 40 previous studies. The injury pattern differs according to different sports and  
49  
50  
51 41 cause of injury.

52  
53 42 Key words: Sports injury, Skiing, Snowboarding

54  
55  
56 43 Article summary

57  
58 44 A booming of Chinese skiing and snowboarding population has been seen  
59  
60

1  
2  
3  
4 45 since China was selected to host the 2022 Winter Olympics in 2015.

5  
6 46 Contradicted to the boom is the insufficient knowledge of the current injury

7  
8  
9 47 pattern in winter sports population in China, and lack of capability dealing with

10  
11  
12 48 traumatic patients in mountainside hospitals in major ski town. This study is to

13  
14  
15 49 investigate the current injury pattern in skiing/snowboarding population in China,

16  
17  
18 50 and to provide evidence for better practice in mountainside hospital near

19  
20  
21 51 popular ski resorts.

22  
23 52 Strengths and limitations of this study

24  
25 53 ·The collection of injury cases was nearly thorough due to the regulations in

26  
27  
28 54 the ski resort.

29  
30 55 ·The severity of injury and accurate diagnosis were not recorded, patients

31  
32  
33 56 were not followed up for their prognosis.

34  
35 57 ·Although medical providers in ski resort have collected injury cases as

36  
37  
38 58 through as possible, there were still patients who went to local or superior

39  
40  
41 59 hospitals without primary care in ski resort clinics, or did not receive any type

42  
43  
44 60 of medical help for mild injuries.

45  
46  
47 61

48  
49  
50 62

51  
52  
53 63

54  
55  
56 64

57  
58  
59 65

60  
61  
62 66

## 1. Introduction

Skiing and snowboarding are popular winter sports world-wide but have a substantial risk of sports injuries, with reported incidence of 1.35 injuries per 1000 skier/snowboarder days in recreational skiers<sup>1</sup> and 6.9 injuries per 1000 runs (or 26.8 injuries per 100 athletes per season)<sup>2</sup> in professional alpine skiers. In the latest Winter Olympic Games in PyeongChang, 12% of the athletes incurred at least one injury, equaling 12.6 injuries per 100 athletes over the 17-day period<sup>3</sup>.

Since Beijing was selected to host the 2022 Winter Olympics, a booming of skiing and snowboarding population in China has been seen, from 8 million in 2015 to 13.2 million in 2018 (industry annual report, 2019). Undoubtedly, hospitals close to ski resorts have confronted a sharp increase of burden of traumatic patients in winter. Unfortunately, large-scale ski resorts are often located in areas away from major cities, with nearby hospitals incapable to ingest large number of patients or manage severe injuries. In order to address this dilemma, local hospital should extend scale, set up specific department and recruit talents according to the injury pattern in Chinese ski resorts.

The purpose of our study is to explore the injury pattern of skiers and snowboarders in China, and to provide the primitive data to guide the reform of the hospital near the venues of the 2022 Winter Olympics.

## 2. Patients and Methods

1  
2  
3  
4 88 The present study was carried out at Wanlong Ski Resort in Chongli, China.  
5  
6 89 It is the biggest ski resort in northern China according to the annual number of  
7  
8  
9 90 visitors (over 388 thousand visits in the season of 2018-2019), with an average  
10  
11  
12 91 ski season of more than 150 days.

13  
14 92 Prior to the season of 2018-2019, the Wanlong Ski Resort reinforced their  
15  
16  
17 93 first-aid patrol and clinics by means of reformation, including:

18  
19 94 1. Enroll more patrol members to inspect for potential risk and off-piste injured  
20  
21  
22 95 skiers, and to response to rescue calls as quickly as possible;

23  
24 96 2. Employ one registered general practitioner and one nurse as primary care  
25  
26  
27 97 provider to manage mild injury and other common diseases, refer patients to  
28  
29  
30 98 local hospital and to carry out basic life support for life-threatening injuries;

31  
32 99 3. Record every injury that is seen by patrol or doctor, including basic  
33  
34  
35 100 information and specific information such as the cause of injury, the location of  
36  
37  
38 101 the accident, type of injury, etc.

39  
40 102 This retrospective study was based on these records. Besides patient's name,  
41  
42  
43 103 gender and age, we also recorded ski equipment, skiing level, the date and  
44  
45  
46 104 time of injury, the cause of injury, the location of the accident and the type of  
47  
48  
49 105 injury. Ski equipment was classified into skis and snowboards. Special  
50  
51  
52 106 equipment, such as cross-country skis, skiboards, was rare in China and not  
53  
54  
55 107 seen in recorded injured people. Patients were asked to report their years of  
56  
57  
58 108 participation in the sports, according to which, beginner (first season), medium



1  
2  
3  
4 109 (1-5 years), advanced (5-10 years) and expert ( $\geq 10$  years) were assigned to  
5  
6 110 each patient.  
7  
8

9 111 The date of injury was divided into weekdays and weekends/holidays  
10  
11 112 according to the Chinese government holiday arrangement. The business hour  
12  
13 113 of Wanlong Ski Resort is 8:00-16:00, so we split the time of injury into 4 periods  
14  
15 114 with 2 hours each, morning (first 2 hours of business), noon, afternoon and late  
16  
17 115 afternoon (last 2 hours of business). According to the subjective description of  
18  
19 116 injury scene, we summarized 2 types of causes of injury: self-inflicted, defined  
20  
21 117 as falling or crashing without any body contact with others; and crash, defined  
22  
23 118 as crashing involving 2 or more people. The location of the accident was also  
24  
25 119 collected, and was categorized into beginner trail, medium trail and advanced  
26  
27 120 trail according to the official data of slope inclination angle.  
28  
29  
30  
31  
32  
33  
34

35 121 We categorized the type of injury into 4 groups: (1) head/cervical, (2) torso,  
36  
37 122 (3) upper extremity, and (4) lower extremity. Whether patients have multi-part  
38  
39 123 injuries was also recorded, while each injured body part was counted in one of  
40  
41 124 the above groups. Acromioclavicular joint injuries were classified as upper limb  
42  
43 125 injury, while other clavicle injuries were classified as torso injuries.<sup>4</sup> Injuries  
44  
45 126 involving gluteal region were classified as torso injury.  
46  
47  
48  
49

50 127 This study was approved by Peking University Third Hospital Medical  
51  
52 128 Science Research Ethics Committee.  
53  
54

55  
56 129 Statistical analysis  
57  
58  
59  
60

1  
2  
3  
4 130 All statistical analysis was performed with SPSS (v 24.0; IBM Corp). Chi-  
5  
6  
7 131 squared test was used to compare categorical variables. Wilcoxon signed-rank  
8  
9 132 test was used for non-parametric data. Student t test was used for parametric  
10  
11  
12 133 data.  $P < 0.05$  was considered statistically significant.

### 134 3. Results

#### 135 Demographic

136 During the season of 2018-2019, there were 388606 visits and 753 sports  
137 injuries recorded in Wanlong Ski Resort. There were other 2 skiers suffered  
138 from fatal cardiac arrest, and not included in our study. The estimated incidence  
139 of injury was 1.94 per 1000 skier days.

140 Among these injuries, 453 cases (60.2%) were associated with skiing. The  
141 mean age of skiers was  $35.1 \pm 14.5$  years, whereas the mean age of  
142 snowboarders was  $29.0 \pm 8.9$  years ( $p < 0.01$ ). There were 68 patients (9.3%)  
143 under the age of 15, 22 patients (3.0%) over the age of 60. There was no  
144 significant difference in the sex profile in both groups, with 63.4% of skiers male  
145 and 62.6% of snowboarders male. 32.8% of the injured were beginners, while  
146 38.3% of them were medium level, 19.0% were advanced, and 10.0% were  
147 expert. Table 1 shows more detailed demographic profiles of these injuries.

#### 148 The features of injury

149 The season of 2018-2019 in Wanlong Ski Resort lasted for 158 days, from  
150 2018/11/1-2019/4/7, consisting of 107 weekdays and 51 weekends/holidays  
151 according to the Chinese government arrangement. The average daily number

1  
2  
3  
4 152 of injuries was 3.38 on weekdays and 7.65 on weekends/holidays. Within a day,  
5  
6  
7 153 9.7% of the injury happened in the first 2 hours of business, 31.6% in noon,  
8  
9 154 22.0% in afternoon, and 36.7% in the last 2 hours of business.

10  
11  
12 155 Self-inflicted accident took up 67.9% of all injuries. The percentage of injuries  
13  
14 156 happened on beginner, medium and advanced trail were 15%, 27.8% and 57.2%  
15  
16  
17 157 respectively. On beginner and advanced trail, the self-inflicted accident resulted  
18  
19 158 in significantly more injuries than crash accident, while on medium trail, the  
20  
21  
22 159 percentage was similar. (Table 2)

23  
24  
25 160 The type of injury showed different patterns between skiers and  
26  
27 161 snowboarders. More than half of the patients injured while skiing sustained  
28  
29  
30 162 lower extremity injuries, while the most common injury in snowboarders was  
31  
32  
33 163 upper extremity injury. Head and cervical injury was identified in 13.7% of skiers  
34  
35 164 and 13.6% of snowboarders. multipart injury took up 5.3% in skiers and 3.4%  
36  
37  
38 165 in snowboarders. (Table 3)

#### 39 40 166 4. Discussion

41  
42  
43 167 The history of skiing industry in China is relatively short compared with  
44  
45 168 European and North American countries. The skiing population in China  
46  
47  
48 169 concentrates in developed areas; however, the condition of terrain and climate  
49  
50  
51 170 in these areas are not suitable for large-scale ski resort. These environmental  
52  
53  
54 171 and socioeconomic factors bestow some specific characteristics on this novel  
55  
56 172 sport in China. Inevitably, these characteristics are closely related to the injury  
57  
58  
59 173 pattern in Chinese skiers and snowboarders.

1  
2  
3  
4 174 We found the incidence of sports injuries of recreational skiing and  
5  
6 175 snowboarding to be 1.94 per 1000 skier days in China, which is similar to  
7  
8  
9 176 reported injury incidence of 1.35-3.7 per 1000 skier days in European and  
10  
11  
12 177 North American countries.<sup>5-7</sup>  
13

14 178 The mean age of injured visitors was 32.5±12.9 years (range 3-73 years),  
15  
16  
17 179 with 9.3% younger than 15 year-old and 3.0% older than 60 year-old. The  
18  
19  
20 180 mean age of skiers was older than snowboarders, which is consistent with  
21  
22 181 other studies.<sup>5,8</sup> Suezie K et al.<sup>5</sup> conducted a study where they listed the top  
23  
24 182 10 injuries in adult and children/adolescent skiers and snowboarders. They  
25  
26  
27 183 found the overall injury pattern was similar between adults and children.  
28  
29  
30 184 However, wrist injury and lower extremity fracture were more likely to be seen  
31  
32  
33 185 in young injured snowboarders. In young skiers, anterior cruciate ligament  
34  
35 186 tear was not prevalent, while tibial fracture was the fifth common injuries in  
36  
37  
38 187 children and adolescent skiers. In china, winter vocation for teenage students  
39  
40  
41 188 lasts for about 4 weeks around Chinese New Year, which creates a peak of  
42  
43 189 teenage visitors to Chongli in January and February. Our results showed  
44  
45  
46 190 sports injury in teenagers concentrate in these two months, and took up  
47  
48 191 nearly 9% of all injures.

49  
50 192 Our results showed no significant difference in the sex profile between  
51  
52  
53 193 skiers and snowboarders, with male comprising the majority of the injured  
54  
55  
56 194 cases. Previous studies found female skiers are more susceptible to lower  
57  
58 195 extremity injury, especially knee injuries, with nearly 50% of injured females  
59  
60

1  
2  
3  
4 196 suffer from knee injury.<sup>9</sup> However, the present study found no predominance  
5  
6 197 of female in lower extremity injuries in both sports groups. Paolo G et al.<sup>10</sup>  
7  
8  
9 198 found that men experienced more severe injuries than women, which may  
10  
11  
12 199 result from higher speed, body weight and trail difficulty in men.  
13

14 200 Due to the small number of participants in other winter sports, such as cross-  
15  
16 201 country, mountaineering, telemark and skiboarding, we divided the injured  
17  
18  
19 202 visitors from Wanlong Ski Resort into 2 categories: skiing and snowboarding.  
20  
21  
22 203 In fact, none of the injuries in our study took place during sports other than  
23  
24 204 skiing or snowboarding. Snowboarding accounted for nearly 40% of the injured  
25  
26  
27 205 population in the latest season. Based on the previously published data, an  
28  
29  
30 206 increase of the percentage of snowboarders in total and injured winter sport  
31  
32  
33 207 population has been noticed.<sup>5,11</sup> Derived from skateboarding in 1970s, this  
34  
35 208 young sport appeals to more young people and at the same time, reshapes the  
36  
37  
38 209 injury profile. In a study conducted in Big Sky area in United States,  
39  
40  
41 210 snowboarders took up 42.8% of injured visitors in the 2009-2010 season, while  
42  
43  
44 211 the number was 23.0% during the ski seasons from 1995-2000.<sup>11</sup> A number of  
45  
46 212 research have found that snowboarders had significantly more injuries to the  
47  
48  
49 213 head, spine and upper extremity when compared with skiers, whereas skiers  
50  
51  
52 214 sustained significantly more lower extremity injures.<sup>5,8</sup> Our results revealed the  
53  
54  
55 215 same patterns, with higher rate of head, upper extremity injuries in  
56  
57  
58 216 snowboarders, and lower rate of lower extremity injuries. The injury severity in  
59  
60 217 different sports was also compared in a study where the authors found the

1  
2  
3  
4 218 percentage of mild, moderate and severe injuries in skiing to be 41%, 44% and  
5  
6 219 15% respectively, while the percentage in snowboarding to be 34%, 53% and  
7  
8  
9 220 13%.<sup>7</sup> Concerning to head injury, Chad C.W et al. <sup>8</sup> found there was no  
10  
11 221 significant difference in Glasgow Coma Scale between skiers and  
12  
13  
14 222 snowboarders with head injury.

15  
16  
17 223 Beginners and medium level skiers (63.5%) and snowboarders (81.4%)  
18  
19 224 made up the majority of injured visitors; while in skiing population, advanced  
20  
21  
22 225 and expert skiers also took a remarkable portion of injuries. When comparing  
23  
24 226 the type of injury between different level groups, no significant difference was  
25  
26  
27 227 found in neither skiers or snowboarders. In a study involving 19, 539 injured  
28  
29  
30 228 snowboarders in Japan, proportions of the trunk and multiple injuries were  
31  
32  
33 229 found to increase with increase in skill level; the injury severity was also found  
34  
35 230 to increase with skill level.<sup>12</sup> Another study found no relationship between skill  
36  
37  
38 231 level and injury severity in skiing and snowboarding population once  
39  
40 232 unconscious patients (who cannot report their skill level) were ruled out.<sup>10</sup>

41  
42  
43 233 Over two thirds of the injuries were self-inflicted, which is similar to the  
44  
45 234 reported rate of self-inflicted injury on Austrian ski slopes.<sup>13</sup> Although the  
46  
47  
48 235 density of skiers/snowboarders on the slope in China is greater than in other  
49  
50 236 countries, the composition of injury shares the same pattern, yet no available  
51  
52  
53 237 studies provide evidence of the influence factors of self-inflicted and crash  
54  
55  
56 238 injury rate.<sup>14</sup> The cause of injury was also found to be related with the type of  
57  
58  
59 239 injury in both skiers and snowboarders. Head injury took up a significantly  
60

1  
2  
3  
4 240 more portion in crash accident than in self-inflicted accident. In skiers, lower  
5  
6 241 extremity injury had the highest rate in both self-inflicted accident and crash  
7  
8  
9 242 accident, while the rate was significantly higher in self-inflicted accident than  
10  
11 243 in crash accident (Table 4). In snowboarders, upper extremity injury was no  
12  
13  
14 244 longer the most frequent injury in crash accident (Table 5).

15  
16  
17 245 The injury incidence calculated in our study is reported incidence in a ski  
18  
19 246 resort clinic, which means the local hospital will be confronting potentially more  
20  
21  
22 247 traumatic cases. According to the government report, the total number of visits  
23  
24  
25 248 in ski resorts in Chongli hit nearly 1 million in the last season, which means an  
26  
27 249 estimated number of more than 2,000 sports injuries in one season. From an  
28  
29  
30 250 epidemiological view, the present study provides strategies that can unload the  
31  
32  
33 251 burden and should be applied to other mountainside hospitals. First, establish  
34  
35 252 pediatric orthopedic department to cope with the pediatric patients who take up  
36  
37  
38 253 nearly 10% of the whole injury population. Second, establish department of  
39  
40 254 neurosurgery and oral and maxillofacial surgery in order to deal with the head  
41  
42  
43 255 injury. Third, rearrange the worktime schedule according to the time-related  
44  
45  
46 256 pattern of winter sports injury to increase effectiveness with limited manpower.  
47  
48 257 Fourth, set up cardiovascular department to provide emergent care for major  
49  
50  
51 258 adverse cardiovascular events.

52  
53 259 There existed several limitations in this study. First, the severity of injury and  
54  
55  
56 260 accurate diagnosis were not recorded, patients were not followed up for their  
57  
58  
59 261 prognosis. Second, although medical providers in ski resort have collected  
60

1  
2  
3  
4 262 injury cases as through as possible, there were still patients who went to local  
5  
6 263 or superior hospitals without primary care in ski resort clinics, or did not receive  
7  
8  
9 264 any type of medical help for mild injuries. Currently, we are conducting a large-  
10  
11 265 scale survey on the demography of Chinese winter sports participants, and a  
12  
13  
14 266 prospective research of winter sports injury in skiing population in China to fill  
15  
16  
17 267 the gap of epidemiological study of winter sports injury in China.

#### 18 19 268 5. Patient and public involvement

20  
21  
22 269 It was not appropriate to involve patients or the public in the design, or  
23  
24  
25 270 conduct, or reporting, or dissemination plans of our research.

#### 26 27 271 6. Acknowledgement

28  
29  
30 272 The medical director of Wanlong Ski Resort, Zhang Jinwei, provided help in  
31  
32  
33 273 the collection of injury data.

#### 34 35 274 7. Funding

36  
37  
38 275 This work was supported by the National Key Research and Development  
39  
40  
41 276 Program of China [2018YFF0301100].

#### 42 43 277 8. Conflicts of interest

44  
45 278 The author states no conflicts of interest.

#### 46 47 279 9. Author Contributions

48  
49  
50 280 Chen Nayun carried out the data analysis and drafted the manuscript. Yang  
51  
52  
53 281 Yuping carried out the design of patient information registration chart, and  
54  
55  
56 282 helped to draft the manuscript. Ao Yingfang conceived of the study, and  
57  
58  
59 283 participated in its design.  
60



1  
2  
3  
4 284 10. Reference

- 5  
6 285 1. Ekeland A, Johnson RJ, Shealy J, Senner V, Dean SW. Skiing and  
7  
8  
9 286 boarding injuries on Norwegian slopes during two winter seasons.  
10  
11 287 Journal of ASTM International. 2010;7(4).  
12  
13  
14 288 2. Haaland B, Steenstrup SE, Bere T, Bahr R, Nordsletten L. Injury rate  
15  
16  
17 289 and injury patterns in FIS World Cup Alpine skiing (2006-2015): have the  
18  
19 290 new ski regulations made an impact? *Br J Sports Med*. 2016;50(1):32-  
20  
21  
22 291 36.  
23  
24  
25 292 3. Soligard T, Palmer D, Steffen K, et al. Sports injury and illness incidence  
26  
27 293 in the PyeongChang 2018 Olympic Winter Games: a prospective study  
28  
29 294 of 2914 athletes from 92 countries. *Br J Sports Med*. 2019;53(17):1085-  
30  
31  
32 295 1092.  
33  
34  
35 296 4. Asadollahi S, Bucknill A. Acute medial clavicle fracture in adults: a  
36  
37  
38 297 systematic review of demographics, clinical features and treatment  
39  
40 298 outcomes in 220 patients. *J Orthop Traumatol*. 2019;20(1):24.  
41  
42  
43 299 5. Kim S, Endres NK, Johnson RJ, Ettlinger CF, Shealy JE. Snowboarding  
44  
45 300 injuries: trends over time and comparisons with alpine skiing injuries. *Am*  
46  
47  
48 301 *J Sports Med*. 2012;40(4):770-776.  
49  
50  
51 302 6. Langran M, Selvaraj S. Snow sports injuries in Scotland: a case-control  
52  
53 303 study. *Br J Sports Med*. 2002;36(2):135-140.  
54  
55  
56 304 7. Stenroos A, Handolin L. Incidence of Recreational Alpine Skiing and  
57  
58 305 Snowboarding Injuries: Six Years Experience in the Largest Ski Resort  
59  
60

- 1  
2  
3  
4 306 in Finland. *Scand J Surg*. 2015;104(2):127-131.  
5  
6 307 8. Wasden CC, McIntosh SE, Keith DS, McCowan C. An analysis of skiing  
7  
8  
9 308 and snowboarding injuries on Utah slopes. *J Trauma*. 2009;67(5):1022-  
10  
11 309 1026.  
12  
13  
14 310 9. Ruedl G, Linortner I, Schranz A, et al. Distribution of injury mechanisms  
15  
16  
17 311 and related factors in ACL-injured female carving skiers. *Knee Surg*  
18  
19 312 *Sports Traumatol Arthrosc*. 2009;17(11):1393-1398.  
20  
21  
22 313 10. Girardi P, Braggion M, Sacco G, De Giorgi F, Corra S. Factors affecting  
23  
24 314 injury severity among recreational skiers and snowboarders: an  
25  
26  
27 315 epidemiology study. *Knee Surg Sports Traumatol Arthrosc*.  
28  
29 316 2010;18(12):1804-1809.  
30  
31  
32 317 11. Coury T, Napoli AM, Wilson M, Daniels J, Murray R, Milzman D. Injury  
33  
34 318 patterns in recreational alpine skiing and snowboarding at a  
35  
36  
37 319 mountainside clinic. *Wilderness Environ Med*. 2013;24(4):417-421.  
38  
39  
40 320 12. Ogawa H, Sumi H, Sumi Y, Shimizu K. Skill level-specific differences in  
41  
42 321 snowboarding-related injuries. *Am J Sports Med*. 2010;38(3):532-537.  
43  
44  
45 322 13. Ruedl G, Philippe M, Sommersacher R, Dunnwald T, Kopp M, Burtscher  
46  
47 323 M. [Current incidence of accidents on Austrian ski slopes]. *Sportverletz*  
48  
49 324 *Sportschaden*. 2014;28(4):183-187.  
50  
51  
52 325 14. Ruedl G, Kopp M, Burtscher M, Bauer R, Benedetto K. [Causes and  
53  
54 326 factors associated with collisions on ski slopes]. *Sportverletz*  
55  
56 327 *Sportschaden*. 2013;27(2):100-104.  
57  
58  
59  
60

328

329

330 Tables and Figures

331 Table 1. Details of injured skiers and snowboarders

|                    | Skiers<br>(n=453) | Snowboarders<br>(n=294) | P value |
|--------------------|-------------------|-------------------------|---------|
| Sex, n (%)         |                   |                         |         |
| Male               | 281 (63.3%)       | 184 (62.6%)             | 0.846   |
| Female             | 163 (36.7%)       | 110 (37.4%)             |         |
| Age, y             | 35.1±14.5         | 29.0±8.9                | <0.01*  |
| Skill level, n (%) |                   |                         |         |
| Beginner           | 110 (29.5%)       | 101 (37.5%)             | <0.01*  |
| Medium             | 127 (34.0%)       | 118 (43.9%)             |         |
| Advanced           | 85 (22.8%)        | 37 (13.8%)              |         |
| Expert             | 51 (13.7%)        | 13 (4.8%)               |         |

332

333 Table 2. Cause and location of accident

|                | Self-inflicted<br>(n=486) | Crash<br>(n=226) | P value |
|----------------|---------------------------|------------------|---------|
| Beginner trail | 93                        | 18               | <0.01*  |
| Medium trail   | 103                       | 87               |         |
| Advanced trail | 292                       | 121              |         |

334

335 Table 3. Type of injuries in skiers and snowboarders

|                   | Skiers<br>(n=417) | Snowboarders<br>(n=265) | P value |
|-------------------|-------------------|-------------------------|---------|
| Head and cervical | 57 (13.7%)        | 36 (13.6%)              | <0.01*  |
| Torso             | 83 (19.9%)        | 63 (23.8%)              |         |
| Upper extremity   | 79 (18.9%)        | 125 (47.2%)             |         |

|                 |             |            |
|-----------------|-------------|------------|
| Lower extremity | 222 (53.2%) | 50 (18.9%) |
| Multipart       | 22 (5.3%)   | 9 (3.4%)   |

336

337 Table 4. The relationship between cause of injury and type of injury in skiers

|                    | Head<br>and<br>cervical | Torso | Upper<br>extremity | Lower<br>extremity | Multipart<br>injury | P<br>value |
|--------------------|-------------------------|-------|--------------------|--------------------|---------------------|------------|
| Self-<br>inflicted | 21                      | 53    | 53                 | 171                | 9                   | <0.01      |
| Crash              | 31                      | 26    | 24                 | 48                 | 12                  |            |

338

339 Table 5. The relationship between cause of injury and type of injury in  
340 snowboarders

|                    | Head<br>and<br>cervical | Torso | Upper<br>extremity | Lower<br>extremity | Multipart<br>injury | P<br>value |
|--------------------|-------------------------|-------|--------------------|--------------------|---------------------|------------|
| Self-<br>inflicted | 17                      | 39    | 107                | 37                 | 3                   | <0.01      |
| Crash              | 19                      | 22    | 16                 | 12                 | 6                   |            |

341

STROBE Statement—Checklist of items that should be included in reports of *cohort studies*

|                           | Item No | Recommendation                                                                                                                                                                                    | Page No |
|---------------------------|---------|---------------------------------------------------------------------------------------------------------------------------------------------------------------------------------------------------|---------|
| <b>Title and abstract</b> | 1       | (a) Indicate the study's design with a commonly used term in the title or the abstract                                                                                                            | 1       |
|                           |         | (b) Provide in the abstract an informative and balanced summary of what was done and what was found                                                                                               | 2       |
| <b>Introduction</b>       |         |                                                                                                                                                                                                   |         |
| Background/rationale      | 2       | Explain the scientific background and rationale for the investigation being reported                                                                                                              | 4       |
| Objectives                | 3       | State specific objectives, including any prespecified hypotheses                                                                                                                                  | 4       |
| <b>Methods</b>            |         |                                                                                                                                                                                                   |         |
| Study design              | 4       | Present key elements of study design early in the paper                                                                                                                                           | 5       |
| Setting                   | 5       | Describe the setting, locations, and relevant dates, including periods of recruitment, exposure, follow-up, and data collection                                                                   | 5       |
| Participants              | 6       | (a) Give the eligibility criteria, and the sources and methods of selection of participants. Describe methods of follow-up                                                                        | 5       |
|                           |         | (b) For matched studies, give matching criteria and number of exposed and unexposed                                                                                                               | NA      |
| Variables                 | 7       | Clearly define all outcomes, exposures, predictors, potential confounders, and effect modifiers. Give diagnostic criteria, if applicable                                                          | 5       |
| Data sources/measurement  | 8*      | For each variable of interest, give sources of data and details of methods of assessment (measurement). Describe comparability of assessment methods if there is more than one group              | 6       |
| Bias                      | 9       | Describe any efforts to address potential sources of bias                                                                                                                                         | 5-6     |
| Study size                | 10      | Explain how the study size was arrived at                                                                                                                                                         | NA      |
| Quantitative variables    | 11      | Explain how quantitative variables were handled in the analyses. If applicable, describe which groupings were chosen and why                                                                      | NA      |
| Statistical methods       | 12      | (a) Describe all statistical methods, including those used to control for confounding                                                                                                             | 7       |
|                           |         | (b) Describe any methods used to examine subgroups and interactions                                                                                                                               | NA      |
|                           |         | (c) Explain how missing data were addressed                                                                                                                                                       | NA      |
|                           |         | (d) If applicable, explain how loss to follow-up was addressed                                                                                                                                    | NA      |
|                           |         | (e) Describe any sensitivity analyses                                                                                                                                                             | NA      |
| <b>Results</b>            |         |                                                                                                                                                                                                   |         |
| Participants              | 13*     | (a) Report numbers of individuals at each stage of study—eg numbers potentially eligible, examined for eligibility, confirmed eligible, included in the study, completing follow-up, and analysed | 7       |
|                           |         | (b) Give reasons for non-participation at each stage                                                                                                                                              | NA      |
|                           |         | (c) Consider use of a flow diagram                                                                                                                                                                | NA      |
| Descriptive data          | 14*     | (a) Give characteristics of study participants (eg demographic, clinical, social) and information on exposures and potential confounders                                                          | 7       |
|                           |         | (b) Indicate number of participants with missing data for each variable of interest                                                                                                               | NA      |
|                           |         | (c) Summarise follow-up time (eg, average and total amount)                                                                                                                                       | NA      |
| Outcome data              | 15*     | Report numbers of outcome events or summary measures over time                                                                                                                                    | 7-8     |

|    |                          |    |                                                                                                                                                                                                              |     |
|----|--------------------------|----|--------------------------------------------------------------------------------------------------------------------------------------------------------------------------------------------------------------|-----|
| 1  | Main results             | 16 | (a) Give unadjusted estimates and, if applicable, confounder-adjusted estimates and their precision (eg, 95% confidence interval). Make clear which confounders were adjusted for and why they were included | 7-8 |
| 2  |                          |    | (b) Report category boundaries when continuous variables were categorized                                                                                                                                    | NA  |
| 3  |                          |    | (c) If relevant, consider translating estimates of relative risk into absolute risk for a meaningful time period                                                                                             | NA  |
| 4  |                          |    |                                                                                                                                                                                                              |     |
| 5  |                          |    |                                                                                                                                                                                                              |     |
| 6  |                          |    |                                                                                                                                                                                                              |     |
| 7  |                          |    |                                                                                                                                                                                                              |     |
| 8  |                          |    |                                                                                                                                                                                                              |     |
| 9  | Other analyses           | 17 | Report other analyses done—eg analyses of subgroups and interactions, and sensitivity analyses                                                                                                               | NA  |
| 10 |                          |    |                                                                                                                                                                                                              |     |
| 11 | <b>Discussion</b>        |    |                                                                                                                                                                                                              |     |
| 12 |                          |    |                                                                                                                                                                                                              |     |
| 13 | Key results              | 18 | Summarise key results with reference to study objectives                                                                                                                                                     | 9   |
| 14 | Limitations              | 19 | Discuss limitations of the study, taking into account sources of potential bias or imprecision. Discuss both direction and magnitude of any potential bias                                                   | 13  |
| 15 |                          |    |                                                                                                                                                                                                              |     |
| 16 | Interpretation           | 20 | Give a cautious overall interpretation of results considering objectives, limitations, multiplicity of analyses, results from similar studies, and other relevant evidence                                   | 13  |
| 17 |                          |    |                                                                                                                                                                                                              |     |
| 18 |                          |    |                                                                                                                                                                                                              |     |
| 19 | Generalisability         | 21 | Discuss the generalisability (external validity) of the study results                                                                                                                                        | NA  |
| 20 |                          |    |                                                                                                                                                                                                              |     |
| 21 | <b>Other information</b> |    |                                                                                                                                                                                                              |     |
| 22 | Funding                  | 22 | Give the source of funding and the role of the funders for the present study and, if applicable, for the original study on which the present article is based                                                | 13  |
| 23 |                          |    |                                                                                                                                                                                                              |     |
| 24 |                          |    |                                                                                                                                                                                                              |     |

\*Give information separately for exposed and unexposed groups.

**Note:** An Explanation and Elaboration article discusses each checklist item and gives methodological background and published examples of transparent reporting. The STROBE checklist is best used in conjunction with this article (freely available on the Web sites of PLoS Medicine at <http://www.plosmedicine.org/>, Annals of Internal Medicine at <http://www.annals.org/>, and Epidemiology at <http://www.epidem.com/>). Information on the STROBE Initiative is available at <http://www.strobe-statement.org>.



北京大学第三医院医学科学研究伦理委员会  
Peking University Third Hospital Medical Science Research Ethics Committee  
伦理审查批件  
Ethical Review Approval Notice

(2019) 医伦审第 (516-01) 号

|                        |                                                                                                                                                                                 |       |
|------------------------|---------------------------------------------------------------------------------------------------------------------------------------------------------------------------------|-------|
| 项目编号                   | IRB00006761-M2019456                                                                                                                                                            |       |
| 临床试验项目名称               | 中国滑雪人群滑雪运动损伤研究                                                                                                                                                                  |       |
| 项目来源                   | 研究者自发                                                                                                                                                                           |       |
| 试验类型                   | 流调类                                                                                                                                                                             |       |
| 产品名称                   | 通用名：无                                                                                                                                                                           | 商品名：无 |
| 药物注册分类                 |                                                                                                                                                                                 | 期别：   |
| CFDA 药物临床试验批件号         |                                                                                                                                                                                 |       |
| 申办者/资助企业               | 无                                                                                                                                                                               |       |
| CRO 公司                 | 无                                                                                                                                                                               |       |
| 临床试验单位及专业 / 科室         | 北京大学第三医院 / 运动医学研究所                                                                                                                                                              |       |
| 主要研究者及职称               | 敖英芳 主任医师                                                                                                                                                                        |       |
| 我院第二主要研究者              | 无                                                                                                                                                                               |       |
| 组长单位                   | 北京大学第三医院                                                                                                                                                                        |       |
| 其他参加研究/合作单位<br>(必要可附表) |                                                                                                                                                                                 |       |
| 审查文件<br>(必要可附表)        | 签名页<br>1- 试验方案及参考文献 版本号2.0 版本日期2019.11.27<br>2- 知情同意书豁免申请<br>3- 保密说明<br>4- 质量管理方案<br>5- 项目风险的预评估及风险处置预案 版本号1.0 版本日期2019.11.20<br>6- 经费来源保障说明<br>大众滑雪爱好者人口学调查问卷 版本1.0 2019.11.20 |       |

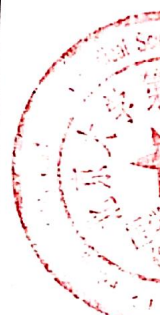

|  |  |
|--|--|
|  |  |
|--|--|

(2019) 医伦审第 (516-01) 号

|               |                                                                                                                                                                                                                                                                                                                                                                                                                                                                                                                                                                                                                                                    |                                                                                       |         |
|---------------|----------------------------------------------------------------------------------------------------------------------------------------------------------------------------------------------------------------------------------------------------------------------------------------------------------------------------------------------------------------------------------------------------------------------------------------------------------------------------------------------------------------------------------------------------------------------------------------------------------------------------------------------------|---------------------------------------------------------------------------------------|---------|
| 投票结果          | 同意1票                                                                                                                                                                                                                                                                                                                                                                                                                                                                                                                                                                                                                                               | 作必要修改后同意0票                                                                            | 转会议审查0票 |
| 审查决定          | 同意                                                                                                                                                                                                                                                                                                                                                                                                                                                                                                                                                                                                                                                 |                                                                                       |         |
| 审查声明          | <p>确认伦理委员会组成和执行符合根据中华人民共和国国家食品药品监督管理总局2003年颁布实施的《药物临床试验质量管理规范》、ICH-GCP、卫计委2016年颁布实施的《涉及人的生物医学研究伦理审查办法》以及《赫尔辛基宣言》和国际医学科学组织委员会颁布的《人体生物医学研究国际道德指南》的伦理原则。</p> <p>A statement confirming that the Ethics Committee is organized and operates according to Good Clinical Practice which is passed by CFDA in 2003, ICH-GCP, Biomedical Research Ethics Review involving human which is passed by Ministry of Health in 2007, Helsinki Declaration and ethical principles of International ethical guidelines for biomedical research involving human subjects which is passed by Council for International Organizations of Medical Science (CIOMS).</p> |                                                                                       |         |
| 审查意见          | 该研究符合伦理审查要求，同意开展。                                                                                                                                                                                                                                                                                                                                                                                                                                                                                                                                                                                                                                  |                                                                                       |         |
| 跟踪审查频率        | 12 个月                                                                                                                                                                                                                                                                                                                                                                                                                                                                                                                                                                                                                                              |                                                                                       |         |
| 伦理审查批件有效期     | 2019年12月24日~2020年12月23日 (请在有效期内启动实施，过期应重新申请审批)                                                                                                                                                                                                                                                                                                                                                                                                                                                                                                                                                                                                     |                                                                                       |         |
| 说明            | <p>1. 本批件将在各研究中心及其伦理委员会备案。如果对方案在本机构的可行性(包括研究者的资格与经验、设备与条件等)有不同意见,请及时与本伦理委员会联系。</p> <p>2. 如对临床试验方案、知情同意书的任何修改,主要研究者更换,应及时通知伦理委员会,重新审查,获得批准后执行。</p> <p>3. 如发生严重不良事件以及影响研究风险受益比的非预期不良事件,研究者应在获知24小时内报告本伦理委员会。</p> <p>4. 暂停/提前终止/完成临床试验,请及时通知伦理委员会。</p> <p>5. 发现严重违反方案情况应及时报告伦理委员会。</p> <p>6. 完成临床试验后,请提交结题报告。</p> <p>7. 请按照批件要求的跟踪审查频率及时向伦理委员会递交跟踪审查报告。</p>                                                                                                                                                                                                                                                                                           |                                                                                       |         |
| 主任委员<br>(签字): | 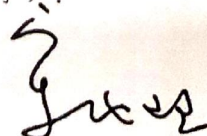                                                                                                                                                                                                                                                                                                                                                                                                                                                                                                                                                                |                                                                                       | 签发日期:   |
|               |                                                                                                                                                                                                                                                                                                                                                                                                                                                                                                                                                                                                                                                    |  |         |



# Please wait...

If this message is not eventually replaced by the proper contents of the document, your PDF viewer may not be able to display this type of document.

You can upgrade to the latest version of Adobe Reader for Windows®, Mac, or Linux® by visiting [http://www.adobe.com/go/reader\\_download](http://www.adobe.com/go/reader_download).

For more assistance with Adobe Reader visit <http://www.adobe.com/go/acrreader>.

Windows is either a registered trademark or a trademark of Microsoft Corporation in the United States and/or other countries. Mac is a trademark of Apple Inc., registered in the United States and other countries. Linux is the registered trademark of Linus Torvalds in the U.S. and other countries.

# BMJ Open

## Injury patterns in a large-scale ski resort in the host city of 2022 Winter Olympic Games: a retrospective study

|                                 |                                                                                                                                                                                                                |
|---------------------------------|----------------------------------------------------------------------------------------------------------------------------------------------------------------------------------------------------------------|
| Journal:                        | <i>BMJ Open</i>                                                                                                                                                                                                |
| Manuscript ID                   | bmjopen-2020-037834.R1                                                                                                                                                                                         |
| Article Type:                   | Original research                                                                                                                                                                                              |
| Date Submitted by the Author:   | 04-Jun-2020                                                                                                                                                                                                    |
| Complete List of Authors:       | Chen, Nayun; Peking University Third Hospital, Institute of Sports Medicine<br>Yang, Yuping; Peking University Third Hospital, Institute of Sports Medicine<br>Ao, Yingfang; Peking University Third Hospital, |
| <b>Primary Subject Heading</b>: | Sports and exercise medicine                                                                                                                                                                                   |
| Secondary Subject Heading:      | Public health                                                                                                                                                                                                  |
| Keywords:                       | SPORTS MEDICINE, PUBLIC HEALTH, Orthopaedic sports trauma < ORTHOPAEDIC & TRAUMA SURGERY                                                                                                                       |
|                                 |                                                                                                                                                                                                                |

SCHOLARONE™  
Manuscripts



I, the Submitting Author has the right to grant and does grant on behalf of all authors of the Work (as defined in the below author licence), an exclusive licence and/or a non-exclusive licence for contributions from authors who are: i) UK Crown employees; ii) where BMJ has agreed a CC-BY licence shall apply, and/or iii) in accordance with the terms applicable for US Federal Government officers or employees acting as part of their official duties; on a worldwide, perpetual, irrevocable, royalty-free basis to BMJ Publishing Group Ltd ("BMJ") its licensees and where the relevant Journal is co-owned by BMJ to the co-owners of the Journal, to publish the Work in this journal and any other BMJ products and to exploit all rights, as set out in our [licence](#).

The Submitting Author accepts and understands that any supply made under these terms is made by BMJ to the Submitting Author unless you are acting as an employee on behalf of your employer or a postgraduate student of an affiliated institution which is paying any applicable article publishing charge ("APC") for Open Access articles. Where the Submitting Author wishes to make the Work available on an Open Access basis (and intends to pay the relevant APC), the terms of reuse of such Open Access shall be governed by a Creative Commons licence – details of these licences and which [Creative Commons](#) licence will apply to this Work are set out in our licence referred to above.

Other than as permitted in any relevant BMJ Author's Self Archiving Policies, I confirm this Work has not been accepted for publication elsewhere, is not being considered for publication elsewhere and does not duplicate material already published. I confirm all authors consent to publication of this Work and authorise the granting of this licence.

1  
2  
3  
4 1 Injury patterns in a large-scale ski resort in the host city of 2022 Winter

5  
6  
7 2 Olympic Games: a retrospective study

8  
9 3 Chen Nayun<sup>1\*</sup>, Yang Yuping<sup>1\*</sup>, Ao Yingfang<sup>1</sup>

10  
11  
12 4 1. Peking University Third Hospital, Peking University Institute of Sports

13  
14 5 Medicine

15  
16  
17 6 \* They contribute equally to this article.

18  
19  
20 7 Corresponding Author: Ao Yingfang

21  
22 8 E-mail: [aoyingfang@163.com](mailto:aoyingfang@163.com)

23  
24  
25 9 Running title: Injury pattern in Chinese ski resort

26  
27  
28 10 Word Count : 3203

1  
2  
3  
4 23 Abstract

5  
6 24 Objective: The aim of the study is to investigate the current injury patterns in  
7  
8  
9 25 skiing/snowboarding population in China, and to provide evidence for better  
10  
11  
12 26 practice in mountainside hospital near ski resort.

13  
14 27 Design: Retrospective study

15  
16  
17 28 Methods: A retrospective study was performed in Wanlong Ski Resort in  
18  
19  
20 29 Chongli. The data of all injured skiers and snowboarders treated in the resort  
21  
22  
23 30 clinic during season 2018-2019 was collected. Patients information, including  
24  
25 31 sex, age, equipment, ski level, injured body part was analyzed.

26  
27 32 Results: A total of 753 sports injuries were recorded. The estimated incidence  
28  
29  
30 33 of injury was 1.94 per 1000 skier days. 453 cases (60.2%) were associated  
31  
32  
33 34 with skiing. The mean age of skiers was older than snowboarders ( $35.1 \pm 14.5$   
34  
35 35 vs.  $29.0 \pm 8.9$ ,  $p < 0.01$ ). Injury not involving others took up 67.9% of all injuries.  
36  
37  
38 36 The most common injured body part in skiers was lower extremity injuries;  
39  
40 37 while in snowboarders, it was upper extremity injuries. Head and cervical  
41  
42  
43 38 injury was identified in 13.7% of skiers and 13.6% of snowboarders.

44  
45 39 Conclusion: The incidence of skiing/snowboarding injury in China is similar to  
46  
47  
48 40 previous studies. The injury pattern differs according to different sports and  
49  
50  
51 41 cause of injury.

52  
53 42 Key words: Sports injury, Skiing, Snowboarding

54  
55  
56 43 Strength and limitations of this study:  
57  
58  
59  
60

1  
2  
3  
4 44 1. Since Beijing was selected to host the 2022 Winter Olympics, skiing and  
5  
6 45 snowboarding population in China has risen rapidly. The present study is the  
7  
8  
9 46 first epidemiological study investigating the injury patterns in Chinese ski  
10  
11  
12 47 resort.

13  
14 48 2. This study provided evidence for restructuring the local hospital in the host  
15  
16  
17 49 city of 2022 Winter Olympic Games.

18  
19 50 3. Several limitations exist in this study. The severity of injury and accurate  
20  
21  
22 51 diagnosis were not recorded, patients were not followed up for their  
23  
24  
25 52 prognosis. There were still patients who went to local or superior hospitals  
26  
27  
28 53 directly, or did not receive any type of medical help for mild injuries. In this  
29  
30 54 case, the incidence of injury may be underestimated.

31  
32 55

33  
34 56

35  
36 57

37  
38 58

39  
40 59

41  
42 60

43  
44 61

45  
46 62

47  
48 63

49  
50 64

51  
52 65

53  
54  
55  
56  
57  
58  
59  
60

1  
2  
3  
4 665  
6 677  
8  
9 68 1. Introduction

10  
11 69 Skiing and snowboarding are popular winter sports world-wide but have a  
12  
13  
14 70 substantial risk of sports injuries, with reported incidence of 0.5-1.35 injuries  
15  
16  
17 71 per 1000 skier/snowboarder days in recreational skiers/snowboarders<sup>1-3</sup> and  
18  
19 72 6.9 injuries per 1000 runs (or 26.8 injuries per 100 athletes per season)<sup>4</sup> in  
20  
21  
22 73 professional alpine skiers in recent years. In the latest Winter Olympic Games  
23  
24 74 in PyeongChang, 12% of the athletes incurred at least one injury, equaling  
25  
26  
27 75 12.6 injuries per 100 athletes over the 17-day period<sup>5</sup>.

28  
29  
30 76 The history of skiing industry in China is relatively short compared with  
31  
32  
33 77 European and North American countries. Since Beijing was selected to host  
34  
35  
36 78 the 2022 Winter Olympics, skiing and snowboarding population in China has  
37  
38 79 risen from 8 million in 2015 to 13.2 million in 2018 (industry annual report,  
39  
40  
41 80 2019). The skiing population in China concentrates in developed areas;  
42  
43 81 however, large-scale ski resorts in China are often located in areas far away  
44  
45  
46 82 from major cities. Undoubtedly, hospitals close to ski resorts have been  
47  
48  
49 83 confronted an increasing amount of injured skiers and snowboarders; yet they  
50  
51  
52 84 are incapable to ingest large number of patients or manage the treatment of  
53  
54 85 severe injuries.

55  
56 86 To the best of our knowledge, there is no epidemiological study  
57  
58  
59 87 investigating current injury patterns in recreational skiers and snowboarders in  
60

1  
2  
3  
4 88 China. The purpose of the study is to explore the injury patterns of skiers and  
5  
6 89 snowboarders in China by investigating the largest ski resort in the host city of  
7  
8  
9 90 2022 Winter Olympic Games, and to provide the primitive data to guide the  
10  
11 91 restructure of the hospital near the venues of the 2022 Winter Olympic  
12  
13  
14 92 Games.

## 17 93 2. Patients and Methods

19 94 The data of this retrospective study was collected from the resort clinic of  
20  
21  
22 95 Wanlong Ski Resort in Chongli during ski season 2018-2019 (Figure 1). The  
23  
24  
25 96 resort clinic is responsible for treating mild injury and other common diseases,  
26  
27 97 transferring patients to local hospital, carrying out basic life support for life-  
28  
29  
30 98 threatening injuries, and recording every injury that is seen by patrol or clinic  
31  
32  
33 99 staff.

35 100 Besides patient's name, sex and age, we also recorded equipment, skill  
36  
37 101 level, the date and time of injury, the cause of injury, the slope difficulty and  
38  
39  
40 102 the injured body part. Equipment was classified into skis and snowboards.  
41  
42  
43 103 Special equipment, such as cross-country skis, skiboards, was rare in China  
44  
45  
46 104 and not seen in recorded injured people. According to self-reported years of  
47  
48 105 participation in skiing and snowboarding, patients were classified as beginner  
49  
50  
51 106 (first season), medium (1-5 years), advanced (5-10 years) and expert ( $\geq 10$   
52  
53 107 years). The date of injury was divided into weekdays and weekends/holidays  
54  
55  
56 108 according to the Chinese government holiday arrangement. The business  
57  
58 109 hour of Wanlong Ski Resort is 8:00-16:00, so we split the time of injury into 4  
59  
60



1  
2  
3  
4 110 periods with 2 hours each, morning (first 2 hours of business), noon,  
5  
6 111 afternoon and late afternoon (last 2 hours of business). According to the  
7  
8  
9 112 subjective description of injury scene, we summarized 2 types of causes of  
10  
11 113 injury: not involving others, defined as falling or crashing without any body  
12  
13 114 contact with others; and involving others, defined as crashing involving 2 or  
14  
15 115 more people. The slope difficulty was also collected and categorized into  
16  
17 116 beginner trail, medium trail and advanced trail according to the official data of  
18  
19 117 slope inclination angle. Injured body part was categorized into the following 4  
20  
21 118 anatomical body regions: (1) head/cervical, (2) torso, (3) upper extremity, and  
22  
23 119 (4) lower extremity. Acromioclavicular joint injuries were classified as upper  
24  
25 120 limb injury, while other clavicle injuries were classified as torso injuries.<sup>6</sup>  
26  
27 121 Injuries involving gluteal region were classified as torso injury. Whether  
28  
29 122 patients have multi-part injuries was also recorded, while each injured body  
30  
31 123 part was counted in one of the above groups. The relationship between  
32  
33 124 injured body part and sex, age, equipment and cause of injury was further  
34  
35 125 determined by subgroup analysis.

36  
37 126 This study was approved by Peking University Third Hospital Medical  
38  
39 127 Science Research Ethics Committee.

#### 40 41 128 Statistical analysis

42  
43 129 All statistical analysis was performed with SPSS (v 24.0; IBM Corp). Sex,  
44  
45 130 skill level and injured body part were compared between skiers and  
46  
47 131 snowboarders using Chi-squared test. Injured body part and slope difficulty  
48  
49  
50  
51  
52  
53  
54  
55  
56  
57  
58  
59  
60

1  
2  
3  
4 132 were compared between injury involving others and injury not involving others  
5  
6 133 using Chi-squared test. Student t test was used to compare age between  
7  
8  
9 134 skiers and snowboarders. When there is missing data, the available case was  
10  
11 135 analyzed to determine difference between groups.  $P < 0.05$  was considered to  
12  
13 136 indicate statistical significance.

### 137 3. Results

#### 138 Demographic

139 During the season of 2018-2019, there were 388606 visits and 753 sports  
140 injuries recorded in Wanlong Ski Resort. The estimated incidence of injury  
141 was 1.94 per 1000 skier days.

142 Among these injuries, 453 cases (60.2%) were associated with skiing. The  
143 mean age of skiers was  $35.1 \pm 14.5$  years, whereas the mean age of  
144 snowboarders was  $29.0 \pm 8.9$  years ( $p < 0.01$ ). There were 78 patients (10.4%)  
145 under 18 years old, 22 patients (3.0%) over the age of 60. There was no  
146 significant difference in the sex profile between skiers and snowboarders, with  
147 63.4% of skiers and 62.6% of snowboarders being male. Among the whole  
148 injury population, 32.8% were beginners, while 38.3% of them were medium  
149 level, 19.0% were advanced, and 10.0% were expert. Table 1 shows more  
150 detailed demographic profiles of these injuries.

151

#### 152 The features of injury

1  
2  
3  
4 153 The season of 2018-2019 in Wanlong Ski Resort lasted for 158 days, from  
5  
6 154 2018/11/1-2019/4/7, consisting of 107 weekdays and 51 weekends/holidays  
7  
8  
9 155 according to the Chinese government arrangement. The average daily  
10  
11  
12 156 number of injuries was 3.38 on weekdays and 7.65 on weekends/holidays.

13  
14 157 Within a day, 9.7% of the injury occurred in the first 2 hours of business,  
15  
16  
17 158 31.6% in noon, 22.0% in afternoon, and 36.7% in the last 2 hours of business.

18  
19 159 The percentage of injuries happened on beginner, medium and advanced  
20  
21  
22 160 trails were 15%, 27.8% and 57.2% respectively. Accident not involving others  
23  
24  
25 161 took up 67.9% of all injuries. On beginner and advanced trails, the accident  
26  
27  
28 162 not involving others resulted in significantly more injuries, while on medium  
29  
30  
31 163 trail, the proportion of accident involving others or not was similar. (Table 2)

32  
33 164 The injured body part showed different patterns between skiers and  
34  
35  
36 165 snowboarders. More than half of the patients injured while skiing sustained  
37  
38  
39 166 lower extremity injuries, while the most common injury in snowboarders was  
40  
41  
42 167 upper extremity injury. Head and cervical injury was identified in 13.7% of  
43  
44  
45 168 skiers and 13.6% of snowboarders. multipart injury took up 5.3% in skiers  
46  
47  
48 169 and 3.4% in snowboarders (Table 3). The cause of injury was also found to  
49  
50  
51 170 be related with the injured body part in both skiers and snowboarders. Head  
52  
53  
54 171 injury took up a significantly more portion in accident involving others. In  
55  
56  
57 172 skiers, lower extremity injury had the highest rate in both accident involving  
58  
59  
60 173 others and accident not involving others, while the rate was significantly  
174 174 higher in accident not involving others (Table 4). In snowboarders, upper

1  
2  
3  
4 175 extremity injury was no longer the most frequent injury in accident involving  
5  
6 176 others (Table 5). The correlation between age, sex, skill level and injured  
7  
8  
9 177 body part was not significant. (Supplementary Tables 1-6)  
10  
11  
12 178

#### 13 14 179 4. Discussion

15  
16  
17 180 The aim of the present study is to explore the injury patterns of skiers and  
18  
19 181 snowboarders in China by investigating the largest ski resort in the host city of  
20  
21  
22 182 2022 Winter Olympic Games, and to provide the primitive data to guide the  
23  
24  
25 183 restructure of the hospital near the venues of the 2022 Winter Olympic  
26  
27 184 Games.  
28

#### 29 30 185 31 32 186 Injury incidence

33  
34  
35 187 It is found that the incidence of sports injuries of recreational skiing and  
36  
37 188 snowboarding is 1.94 per 1000 skier days in Wanlong ski resort, which lies  
38  
39  
40 189 between the reported injury incidence of 0.5-3.7 per 1000 skier days in  
41  
42  
43 190 European and North American countries in recent years.<sup>1,7-9</sup> According to the  
44  
45 191 government report, the total number of visits in ski resorts in Chongli hit nearly  
46  
47  
48 192 1 million in the 2018-19 ski season, which means an estimated number of  
49  
50  
51 193 2,000 sports injuries. The injury incidence calculated in our study is based on  
52  
53 194 data collected from ski resort clinic, which means the local hospital will be  
54  
55  
56 195 confronting potentially more traumatic cases.  
57

58 196  
59  
60

1  
2  
3  
4 197 Injury patterns  
5

6 198 The mean age of injured visitors was  $32.5\pm 12.9$  years (range 3-73 years),  
7  
8  
9 199 with 10.4% younger than 18 years old and 3.0% older than the age of 60.  
10

11 200 The mean age of skiers was older than snowboarders, which is consistent  
12  
13  
14 201 with other studies.<sup>7,10</sup> In china, winter vacation for teenage students lasts for  
15  
16  
17 202 about 4 weeks around Chinese New Year, which creates a peak of teenage  
18  
19  
20 203 visitors to Chongli in January and February. The results showed sports  
21  
22 204 injury in teenagers concentrate in these two months, and took up nearly  
23  
24  
25 205 11% of all injures. The incidence of ski injury was reported higher in  
26  
27  
28 206 teenagers than in adults.<sup>11</sup> Suezie K et al.<sup>7</sup> conducted a study where they  
29  
30  
31 207 listed the top 10 injuries in adult and children/adolescent skiers and  
32  
33  
34 208 snowboarders. They found the overall injury patterns were similar between  
35  
36  
37 209 adults and children. However, wrist injury and lower extremity fracture were  
38  
39  
40 210 more likely to be seen in young injured snowboarders. In young skiers,  
41  
42  
43 211 anterior cruciate ligament tear was not prevalent, while tibial fracture was  
44  
45  
46 212 the fifth common injuries in children and adolescent skiers.

47 213 No significant difference was shown in the sex profile between injured  
48  
49  
50 214 skiers and snowboarders. Previous studies found female skiers are more  
51  
52  
53 215 susceptible to lower extremity injury, especially knee injuries, with nearly  
54  
55  
56 216 50% of injured females suffer from knee injury.<sup>12</sup> The present study found  
57  
58  
59 217 similar rate of female suffering from lower extremity injuries in skiing  
60  
218 population; however, there was no significant difference in injured body part

1  
2  
3  
4 219 between males and females in both sports groups. Paolo G et al.<sup>13</sup> found  
5  
6 220 that men experienced more severe injuries than women, which may result  
7  
8  
9 221 from higher speed, body weight and trail difficulty in men.  
10

11 222 Due to the small number of participants in other winter sports, such as  
12  
13 223 cross-country, mountaineering, telemark and skiing, we divided the  
14  
15 224 injured visitors from Wanlong Ski Resort into 2 categories: skiing and  
16  
17 225 snowboarding. Snowboarding accounted for nearly 40% of the injured  
18  
19 226 population in the latest season. Based on the previously published data, an  
20  
21 227 increase of the percentage of snowboarders in total and injured winter sport  
22  
23 228 population has been noticed.<sup>7,14</sup> Derived from skateboarding in 1970s, this  
24  
25 229 young sport appeals to more young people and at the same time, reshapes  
26  
27 230 the injury profile. In a study conducted in Big Sky area in United States,  
28  
29 231 snowboarders took up 42.8% of injured visitors in the 2009-2010 season,  
30  
31 232 while between 1995 and 2000 only 23.0% of injured people were  
32  
33 233 snowboarders.<sup>14</sup> Many studies reported that snowboarders had significantly  
34  
35 234 more injuries to the head, spine and upper extremity when compared with  
36  
37 235 skiers, whereas skiers sustained significantly more lower extremity  
38  
39 236 injuries.<sup>7,10,15</sup> The present study revealed the same patterns, with higher rates  
40  
41 237 of head, upper extremity injuries in snowboarders, and lower rates of lower  
42  
43 238 extremity injuries. In a study comparing injury severity in different sports, the  
44  
45 239 authors reported that the percentage of mild, moderate and severe injuries in  
46  
47 240 skiing were 41%, 44% and 15% respectively, while the percentage in  
48  
49  
50  
51  
52  
53  
54  
55  
56  
57  
58  
59  
60

1  
2  
3  
4 241 snowboarding were 34%, 53% and 13%.<sup>9</sup> Maat SC et al. <sup>15</sup>reported that skiers  
5  
6 242 were more seriously injured with Injury Severity Scale (ISS) higher than 9.  
7  
8

9 243 Beginners and medium level skiers (63.5%) and snowboarders (81.4%)  
10  
11 244 made up the majority of injured visitors. When comparing the injured body  
12  
13 245 part between different level groups, no significant difference was found in  
14  
15 246 neither skiers nor snowboarders. In a study involving 19539 injured  
16  
17 247 snowboarders in Japan, proportions of the trunk and multiple injuries were  
18  
19 248 found to increase with higher skill level; the injury severity was also found to  
20  
21 249 increase with skill level.<sup>16</sup> Another study found no relationship between skill  
22  
23 250 level and injury severity in skiing and snowboarding population once  
24  
25 251 unconscious patients (who cannot report their skill level) were ruled out.<sup>13</sup>  
26  
27  
28  
29

30  
31 252 Over two thirds of the injuries did not involve others, which is lower than  
32  
33 253 the reported rate of self-inflicted injury on Austrian ski slopes.<sup>3</sup> The  
34  
35 254 difference are likely attributed to the higher density of skiers/snowboarders  
36  
37 255 on the slope in China compared with other countries, which is implied by the  
38  
39 256 fact that the rate of crash accident was extremely high on medium trails.  
40  
41 257 Yet, no available studies provide conclusive evidence of the influence  
42  
43 258 factors of self-inflicted and crash injury rate.<sup>17</sup> The cause of injury was also  
44  
45 259 found to be related with the injured body part in both skiers and  
46  
47 260 snowboarders. Head injury took up a significantly more portion in accident  
48  
49 261 involving others. Sport-specific injuries, such as shoulder injury in  
50  
51 262 snowboarding and knee injury in skiing,<sup>7</sup> were more frequent in accident not  
52  
53  
54  
55  
56  
57  
58  
59  
60

1  
2  
3  
4 263 involving others. These findings can be attributed to different injury  
5  
6 264 mechanism prevalent in various traumatic setting, with non-contact injury  
7  
8  
9 265 often causing ligament and tendon sprains or tears, contact injury causing  
10  
11 266 bony injury and concussion.<sup>18</sup>  
12  
13

14 267

### 17 268 Strategies to local hospital

19 269 From an epidemiological view, the present study provides strategies that  
20  
21  
22 270 can guide the restructure of local hospital and unload the burden in winter  
23  
24 271 season. First, establish pediatric orthopedic department to cope with the  
25  
26  
27 272 pediatric patients who take up nearly 11% of the whole injury population,  
28  
29  
30 273 especially the surge during winter vacation in China. Second, establish  
31  
32 274 department of neurosurgery and department of oral and maxillofacial surgery  
33  
34  
35 275 in order to deal with the head and face injury, which took up to 15% of all  
36  
37  
38 276 injuries. Third, rearrange the worktime schedule according to the time-related  
39  
40 277 “tide” of winter sports injury to increase effectiveness with limited manpower.  
41  
42  
43 278 For example, change weekends into work days and set other rest days in  
44  
45 279 winter season to cope with the traumatic cases in weekend which are twice as  
46  
47  
48 280 many as in weekdays. Fourth, build up communication and cooperation  
49  
50  
51 281 network with nearby ski resorts to allow access to critical patient’s information  
52  
53 282 in advance and guide prehospital care. Up to now, the local hospital in  
54  
55  
56 283 Chongli has reinforced its orthopedics and sports medicine department by  
57  
58 284 seeking cooperation with superior hospitals in Beijing. An evidence-based  
59  
60



1  
2  
3  
4 285 restructure of local hospital may increase the accessibility to health care for  
5  
6 286 injured skiers and snowboarders in nearby ski resorts.  
7  
8

9 287 Several limitations exist in this study. First, the severity of injury and  
10  
11 288 accurate diagnosis were not recorded, patients were not followed up for their  
12  
13 289 prognosis. Second, although medical providers in ski resort have collected  
14  
15 290 injury cases as through as possible, there were still patients who went to local  
16  
17 291 or superior hospitals directly, or did not receive any type of medical help for  
18  
19 292 mild injuries. In this case, the incidence of injury may be underestimated.  
20  
21  
22 293 Currently, we are conducting a large-scale survey on the demography of  
23  
24 294 Chinese winter sports participants, and a prospective research of winter  
25  
26 295 sports injury in skiing population in China to fill the gap of epidemiological  
27  
28 296 study of winter sports injury in China. The effectiveness of hospital restructure  
29  
30 297 will be reported as well.  
31  
32  
33  
34  
35  
36

### 37 298 5. Patient and public involvement

38  
39  
40 299 It was not appropriate to involve patients or the public in the design, or  
41  
42 300 conduct, or reporting, or dissemination plans of our research.  
43  
44

### 45 301 6. Acknowledgement

46  
47  
48 302 The medical director of Wanlong Ski Resort, Zhang Jinwei, provided help in  
49  
50 303 the collection of injury data.  
51  
52

### 53 304 7. Funding

54  
55  
56 305 This work was supported by the National Key Research and Development  
57  
58 306 Program of China [2018YFF0301100].  
59  
60

1  
2  
3  
4 307 8. Conflicts of interest

5  
6 308 The author states no conflicts of interest.

7  
8  
9 309 9. Author Contributions

10  
11 310 Chen Nayun carried out the data analysis and drafted the manuscript. Yang  
12  
13  
14 311 Yuping carried out the design of patient information registration chart, and  
15  
16  
17 312 helped to draft the manuscript. Ao Yingfang conceived of the study, and  
18  
19  
20 313 participated in its design.

21  
22 314 10. Data availability statement

23  
24 315 The data in the present study is deidentified participant data which are  
25  
26  
27 316 available upon reasonable request. Please contact the first author for  
28  
29  
30 317 permission to reuse the original data. Email: albert\_west@163.com

31  
32 318 11. Reference

- 33  
34  
35 319 1. Ekeland A, Johnson RJ, Shealy J, Senner V, Dean SW. Skiing and  
36  
37 320 boarding injuries on Norwegian slopes during two winter seasons.  
38  
39  
40 321 Journal of ASTM International. 2010;7(4).
- 41  
42  
43 322 2. Castellani C, Singer G, Eibisberger M, et al. An epidemiologic analysis  
44  
45 323 of winter sport accidents on ski slopes comparing two seasons. *J Sports*  
46  
47  
48 324 *Med Phys Fitness*. 2019;59(4):648-654.
- 49  
50  
51 325 3. Ruedl G, Philippe M, Sommersacher R, Dunnwald T, Kopp M, Burtscher  
52  
53 326 M. [Current incidence of accidents on Austrian ski slopes]. *Sportverletz*  
54  
55 327 *Sportschaden*. 2014;28(4):183-187.
- 56  
57  
58 328 4. Haaland B, Steenstrup SE, Bere T, Bahr R, Nordsletten L. Injury rate  
59  
60

- 1  
2  
3  
4 329 and injury patterns in FIS World Cup Alpine skiing (2006-2015): have the  
5  
6 330 new ski regulations made an impact? *Br J Sports Med.* 2016;50(1):32-  
7  
8  
9 331 36.  
10  
11 332 5. Soligard T, Palmer D, Steffen K, et al. Sports injury and illness incidence  
12  
13 333 in the PyeongChang 2018 Olympic Winter Games: a prospective study  
14  
15 334 of 2914 athletes from 92 countries. *Br J Sports Med.* 2019;53(17):1085-  
16  
17 335 1092.  
18  
19 336 6. Asadollahi S, Bucknill A. Acute medial clavicle fracture in adults: a  
20  
21 337 systematic review of demographics, clinical features and treatment  
22  
23 338 outcomes in 220 patients. *J Orthop Traumatol.* 2019;20(1):24.  
24  
25 339 7. Kim S, Endres NK, Johnson RJ, Ettlinger CF, Shealy JE. Snowboarding  
26  
27 340 injuries: trends over time and comparisons with alpine skiing injuries. *Am*  
28  
29 341 *J Sports Med.* 2012;40(4):770-776.  
30  
31 342 8. Langran M, Selvaraj S. Snow sports injuries in Scotland: a case-control  
32  
33 343 study. *Br J Sports Med.* 2002;36(2):135-140.  
34  
35 344 9. Stenroos A, Handolin L. Incidence of Recreational Alpine Skiing and  
36  
37 345 Snowboarding Injuries: Six Years Experience in the Largest Ski Resort  
38  
39 346 in Finland. *Scand J Surg.* 2015;104(2):127-131.  
40  
41 347 10. Wasden CC, McIntosh SE, Keith DS, McCowan C. An analysis of skiing  
42  
43 348 and snowboarding injuries on Utah slopes. *J Trauma.* 2009;67(5):1022-  
44  
45 349 1026.  
46  
47 350 11. Provance AJ, Daoud AK, Tagawa A, Rhodes J. Pediatric and adolescent  
48  
49  
50  
51  
52  
53  
54  
55  
56  
57  
58  
59  
60

- 1  
2  
3  
4 351 injury in skiing. *Res Sports Med.* 2018;26(sup1):150-165.  
5  
6 352 12. Ruedl G, Linortner I, Schranz A, et al. Distribution of injury mechanisms  
7  
8  
9 353 and related factors in ACL-injured female carving skiers. *Knee Surg*  
10  
11 354 *Sports Traumatol Arthrosc.* 2009;17(11):1393-1398.  
12  
13  
14 355 13. Girardi P, Braggion M, Sacco G, De Giorgi F, Corra S. Factors affecting  
15  
16  
17 356 injury severity among recreational skiers and snowboarders: an  
18  
19 357 epidemiology study. *Knee Surg Sports Traumatol Arthrosc.*  
20  
21 358 2010;18(12):1804-1809.  
22  
23  
24 359 14. Coury T, Napoli AM, Wilson M, Daniels J, Murray R, Milzman D. Injury  
25  
26  
27 360 patterns in recreational alpine skiing and snowboarding at a  
28  
29 361 mountainside clinic. *Wilderness Environ Med.* 2013;24(4):417-421.  
30  
31  
32 362 15. Maat SC, Luppino FS, Schipper IB, Krijnen P, Bartlema KA. Injury  
33  
34  
35 363 patterns after skiing and snowboarding sports accidents. *J Sports Med*  
36  
37 364 *Phys Fitness.* 2020;60(1):119-124.  
38  
39  
40 365 16. Ogawa H, Sumi H, Sumi Y, Shimizu K. Skill level-specific differences in  
41  
42  
43 366 snowboarding-related injuries. *Am J Sports Med.* 2010;38(3):532-537.  
44  
45  
46 367 17. Ruedl G, Kopp M, Burtscher M, Bauer R, Benedetto K. [Causes and  
47  
48 368 factors associated with collisions on ski slopes]. *Sportverletz*  
49  
50 369 *Sportschaden.* 2013;27(2):100-104.  
51  
52  
53 370 18. Davey A, Endres NK, Johnson RJ, Shealy JE. Alpine Skiing Injuries.  
54  
55 371 *Sports Health.* 2019;11(1):18-26.  
56  
57  
58 372  
59  
60

373

374 Tables and Figures

375

Table 1. Details of injured skiers and snowboarders

|                    | Skiers<br>(n=453) | Snowboarders<br>(n=294) | P value |
|--------------------|-------------------|-------------------------|---------|
| Sex, n (%)         |                   |                         |         |
| Male               | 281 (63.3%)       | 184 (62.6%)             | 0.846   |
| Female             | 163 (36.7%)       | 110 (37.4%)             |         |
| Age, y             | 35.1±14.5         | 29.0±8.9                | <0.01*  |
| Skill level, n (%) |                   |                         |         |
| Beginner           | 110 (29.5%)       | 101 (37.5%)             | <0.01*  |
| Medium             | 127 (34.0%)       | 118 (43.9%)             |         |
| Advanced           | 85 (22.8%)        | 37 (13.8%)              |         |
| Expert             | 51 (13.7%)        | 13 (4.8%)               |         |

376

377

Table 2. Cause of injury and slope difficulty

|                | Injury not<br>involving others<br>(n=486) | Injury involving<br>others<br>(n=226) | P value |
|----------------|-------------------------------------------|---------------------------------------|---------|
| Beginner trail | 93                                        | 18                                    | <0.01*  |
| Medium trail   | 103                                       | 87                                    |         |
| Advanced trail | 292                                       | 121                                   |         |

378

379

Table 3. injured body part in skiers and snowboarders

|                   | Skiers<br>(n=417) | Snowboarders<br>(n=265) | P value |
|-------------------|-------------------|-------------------------|---------|
| Head and cervical | 57 (13.7%)        | 36 (13.6%)              | <0.01*  |
| Torso             | 83 (19.9%)        | 63 (23.8%)              |         |
| Upper extremity   | 79 (18.9%)        | 125 (47.2%)             |         |
| Lower extremity   | 222 (53.2%)       | 50 (18.9%)              |         |
| Multipart         | 22 (5.3%)         | 9 (3.4%)                |         |

380

Table 4. The relationship between cause of injury and injured body part in skiers

382

|                   | Injury not<br>involving others<br>(n=289) | Injury involving<br>others<br>(n=116) | P value |
|-------------------|-------------------------------------------|---------------------------------------|---------|
| Head and cervical | 21(7.3%)                                  | 31(26.7%)                             | <0.01   |
| Torso             | 53(18.3%)                                 | 26(22.4%)                             |         |
| Upper extremity   | 53(18.3%)                                 | 24(20.7%)                             |         |
| Lower extremity   | 171(59.2%)                                | 48(41.4%)                             |         |
| Multipart injury  | 9(3.1%)                                   | 12(10.3%)                             |         |

383

384 Table 5. The relationship between cause of injury and injured body partin

385 snowboarders

|                   | Injury not<br>involving others<br>(n=197) | Injury involving<br>others<br>(n=63) | P value |
|-------------------|-------------------------------------------|--------------------------------------|---------|
| Head and cervical | 17(8.6%)                                  | 19(30.1%)                            | <0.01   |
| Torso             | 39(19.8%)                                 | 22(34.9%)                            |         |
| Upper extremity   | 107(54.3%)                                | 16(25.4%)                            |         |
| Lower extremity   | 37(18.8%)                                 | 12(19.0%)                            |         |
| Multipart injury  | 3(1.5%)                                   | 6(9.5%)                              |         |

386

387 Figure 1. The flow chart on how the injury occurred in the ski resort was

388 managed. If the patrol was called, the injured tourist will be sent to the resort

389 clinic where further management was performed. If the patrol was called, the

390 injured tourists may self-present to the resort clinic or go to other hospitals

391 without seeing the clinic staff first, or even have no health-seeking behavior.

392 The data in this study was collected during 2018-19 winter season.

393

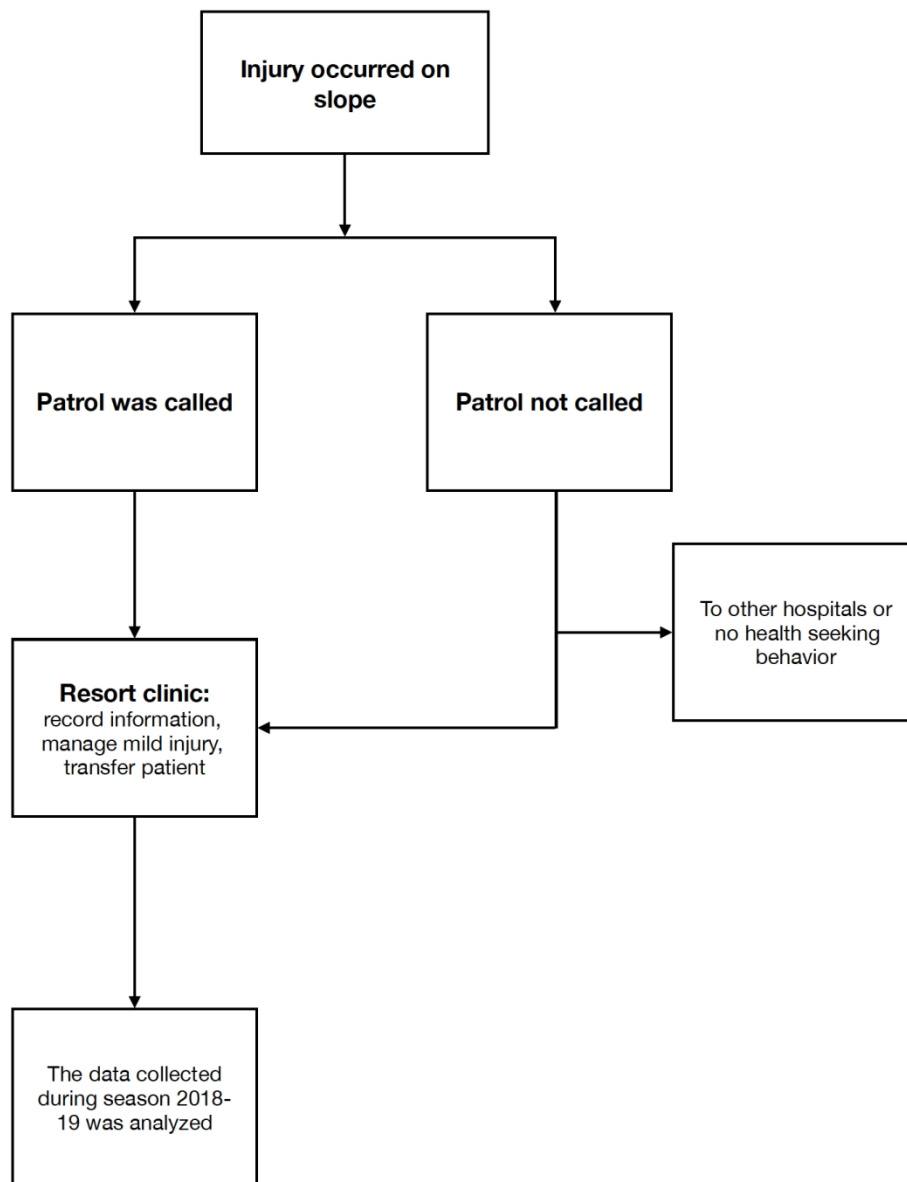

45 The flow chart on how the injury occurred in the ski resort was managed. If the patrol was called, the  
46 injured tourist will be sent to the resort clinic where further management was performed. If the patrol was  
47 called, the injured tourists may self-present to the resort clinic or go to other hospitals without seeing the  
48 clinic staff first, or even have no health-seeking behavior. The data in this study was collected during 2018-  
49 19 winter season.

50 492x644mm (72 x 72 DPI)



Table 1. The relationship between sex and injured body part in skiers

|                   | Male<br>(n=260) | Female<br>(n=158) | P value |
|-------------------|-----------------|-------------------|---------|
| Head and cervical | 32(12.3%)       | 25(15.8%)         | 0.29    |
| Torso             | 58(22.3%)       | 24(15.2%)         |         |
| Upper extremity   | 51(19.6%)       | 28(17.7%)         |         |
| Lower extremity   | 131(50.4%)      | 91(57.6%)         |         |
| Multipart injury  | 12(4.6%)        | 10(6.3%)          |         |

Table 2. The relationship between sex and injured body part in snowboarders

|                   | Male<br>(n=158) | Female<br>(n=107) | P value |
|-------------------|-----------------|-------------------|---------|
| Head and cervical | 21(13.3%)       | 15(14.0%)         | 0.63    |
| Torso             | 42(25.6%)       | 21(19.6%)         |         |
| Upper extremity   | 74(46.8%)       | 51(47.7%)         |         |
| Lower extremity   | 26(16.5%)       | 24(22.4%)         |         |
| Multipart injury  | 5(3.2%)         | 4(3.7%)           |         |

Table 3. The relationship between age and injured body part in skiers

|                   | Teenager<br>(n=52) | Adult<br>(n=329) | Elderly<br>(n=22) | P value |
|-------------------|--------------------|------------------|-------------------|---------|
| Head and cervical | 15(28.8%)          | 39(11.9%)        | 2(9.1%)           | 0.14    |
| Torso             | 6(11.5%)           | 70(21.3%)        | 4(18.2%)          |         |
| Upper extremity   | 12(23.1%)          | 57(17.3%)        | 8(36.4%)          |         |
| Lower extremity   | 22(42.3%)          | 179(54.4%)       | 11(50%)           |         |
| Multipart injury  | 3(5.8%)            | 16(4.9%)         | 3(13.6%)          |         |

Table 4. The relationship between age and injured body part in snowboarders

|                   | Male<br>(n=26) | Female<br>(n=238) | Elderly<br>(n=0) | P value |
|-------------------|----------------|-------------------|------------------|---------|
| Head and cervical | 6(23.1%)       | 30(12.6%)         | 0                | 0.21    |
| Torso             | 4(15.4%)       | 59(25.2%)         | 0                |         |
| Upper extremity   | 15(57.7%)      | 109(45.8%)        | 0                |         |
| Lower extremity   | 2(7.7%)        | 48(20.2%)         | 0                |         |
| Multipart injury  | 1(3.8%)        | 8(3.4%)           | 0                |         |

Table 5. The relationship between skill level and injured body part in skiers

|                   | Beginner<br>(n=106) | Medium<br>(n=118) | Advanced<br>(n=79) | Expert<br>(n=49) | P value |
|-------------------|---------------------|-------------------|--------------------|------------------|---------|
| Head and cervical | 13(28.8%)           | 12(11.9%)         | 11(9.1%)           | 5(%)             | 0.19    |
| Torso             | 18(11.5%)           | 27(21.3%)         | 16(18.2%)          | 10(%)            |         |
| Upper extremity   | 22(23.1%)           | 18(17.3%)         | 15(36.4%)          | 13(%)            |         |
| Lower extremity   | 54(42.3%)           | 164(54.4%)        | 48(50%)            | 24(%)            |         |
| Multipart injury  | 2(5.8%)             | 4(4.9%)           | 9(13.6%)           | 3(%)             |         |

Table 6. The relationship between skill level and injured body part in snowboarders

|                   | Beginner<br>(n=93) | Medium<br>(n=109) | Advance<br>(n=36) | Expert<br>(n=11) | P<br>value |
|-------------------|--------------------|-------------------|-------------------|------------------|------------|
| Head and cervical | 15(23.1%)          | 11(12.6%)         | 5                 | 1                | 0.32       |
| Torso             | 20(15.4%)          | 27(25.2%)         | 10                | 2                |            |
| Upper extremity   | 46(57.7%)          | 51(45.8%)         | 14                | 7                |            |
| Lower extremity   | 14(7.7%)           | 26(20.2%)         | 8                 | 8                |            |

1  
2  
3  
4  
5  
6  
7  
8  
9  
10  
11  
12  
13  
14  
15  
16  
17  
18  
19  
20  
21  
22  
23  
24  
25  
26  
27  
28  
29  
30  
31  
32  
33  
34  
35  
36  
37  
38  
39  
40  
41  
42  
43  
44  
45  
46  
47  
48  
49  
50  
51  
52  
53  
54  
55  
56  
57  
58  
59  
60

|                  |         |         |   |   |
|------------------|---------|---------|---|---|
| Multipart injury | 2(3.8%) | 6(3.4%) | 1 | 0 |
|------------------|---------|---------|---|---|

---

For peer review only

STROBE Statement—Checklist of items that should be included in reports of *cohort studies*

|                              | Item No | Recommendation                                                                                                                                                                                    | Page No |
|------------------------------|---------|---------------------------------------------------------------------------------------------------------------------------------------------------------------------------------------------------|---------|
| <b>Title and abstract</b>    | 1       | (a) Indicate the study's design with a commonly used term in the title or the abstract                                                                                                            | 1       |
|                              |         | (b) Provide in the abstract an informative and balanced summary of what was done and what was found                                                                                               | 2       |
| <b>Introduction</b>          |         |                                                                                                                                                                                                   |         |
| Background/rationale         | 2       | Explain the scientific background and rationale for the investigation being reported                                                                                                              | 3       |
| Objectives                   | 3       | State specific objectives, including any prespecified hypotheses                                                                                                                                  | 3       |
| <b>Methods</b>               |         |                                                                                                                                                                                                   |         |
| Study design                 | 4       | Present key elements of study design early in the paper                                                                                                                                           | 5       |
| Setting                      | 5       | Describe the setting, locations, and relevant dates, including periods of recruitment, exposure, follow-up, and data collection                                                                   | 5       |
| Participants                 | 6       | (a) Give the eligibility criteria, and the sources and methods of selection of participants. Describe methods of follow-up                                                                        | 5       |
|                              |         | (b) For matched studies, give matching criteria and number of exposed and unexposed                                                                                                               | NA      |
| Variables                    | 7       | Clearly define all outcomes, exposures, predictors, potential confounders, and effect modifiers. Give diagnostic criteria, if applicable                                                          | 5       |
| Data sources/<br>measurement | 8*      | For each variable of interest, give sources of data and details of methods of assessment (measurement). Describe comparability of assessment methods if there is more than one group              | 6       |
| Bias                         | 9       | Describe any efforts to address potential sources of bias                                                                                                                                         | NA      |
| Study size                   | 10      | Explain how the study size was arrived at                                                                                                                                                         | NA      |
| Quantitative variables       | 11      | Explain how quantitative variables were handled in the analyses. If applicable, describe which groupings were chosen and why                                                                      | NA      |
| Statistical methods          | 12      | (a) Describe all statistical methods, including those used to control for confounding                                                                                                             | 6       |
|                              |         | (b) Describe any methods used to examine subgroups and interactions                                                                                                                               | NA      |
|                              |         | (c) Explain how missing data were addressed                                                                                                                                                       | 6       |
|                              |         | (d) If applicable, explain how loss to follow-up was addressed                                                                                                                                    | NA      |
|                              |         | (e) Describe any sensitivity analyses                                                                                                                                                             | NA      |
| <b>Results</b>               |         |                                                                                                                                                                                                   |         |
| Participants                 | 13*     | (a) Report numbers of individuals at each stage of study—eg numbers potentially eligible, examined for eligibility, confirmed eligible, included in the study, completing follow-up, and analysed | 7       |
|                              |         | (b) Give reasons for non-participation at each stage                                                                                                                                              | NA      |
|                              |         | (c) Consider use of a flow diagram                                                                                                                                                                | NA      |
| Descriptive data             | 14*     | (a) Give characteristics of study participants (eg demographic, clinical, social) and information on exposures and potential confounders                                                          | 7       |
|                              |         | (b) Indicate number of participants with missing data for each variable of interest                                                                                                               | NA      |
|                              |         | (c) Summarise follow-up time (eg, average and total amount)                                                                                                                                       | NA      |
| Outcome data                 | 15*     | Report numbers of outcome events or summary measures over time                                                                                                                                    | 7-8     |

|    |                          |    |                                                                                                                                                                                                              |     |
|----|--------------------------|----|--------------------------------------------------------------------------------------------------------------------------------------------------------------------------------------------------------------|-----|
| 1  | Main results             | 16 | (a) Give unadjusted estimates and, if applicable, confounder-adjusted estimates and their precision (eg, 95% confidence interval). Make clear which confounders were adjusted for and why they were included | 7-8 |
| 2  |                          |    | (b) Report category boundaries when continuous variables were categorized                                                                                                                                    | NA  |
| 3  |                          |    | (c) If relevant, consider translating estimates of relative risk into absolute risk for a meaningful time period                                                                                             | NA  |
| 4  |                          |    |                                                                                                                                                                                                              |     |
| 5  |                          |    |                                                                                                                                                                                                              |     |
| 6  |                          |    |                                                                                                                                                                                                              |     |
| 7  |                          |    |                                                                                                                                                                                                              |     |
| 8  |                          |    |                                                                                                                                                                                                              |     |
| 9  | Other analyses           | 17 | Report other analyses done—eg analyses of subgroups and interactions, and sensitivity analyses                                                                                                               | NA  |
| 10 |                          |    |                                                                                                                                                                                                              |     |
| 11 | <b>Discussion</b>        |    |                                                                                                                                                                                                              |     |
| 12 |                          |    |                                                                                                                                                                                                              |     |
| 13 | Key results              | 18 | Summarise key results with reference to study objectives                                                                                                                                                     | 9   |
| 14 | Limitations              | 19 | Discuss limitations of the study, taking into account sources of potential bias or imprecision. Discuss both direction and magnitude of any potential bias                                                   | 13  |
| 15 |                          |    |                                                                                                                                                                                                              |     |
| 16 | Interpretation           | 20 | Give a cautious overall interpretation of results considering objectives, limitations, multiplicity of analyses, results from similar studies, and other relevant evidence                                   | 13  |
| 17 |                          |    |                                                                                                                                                                                                              |     |
| 18 |                          |    |                                                                                                                                                                                                              |     |
| 19 | Generalisability         | 21 | Discuss the generalisability (external validity) of the study results                                                                                                                                        | NA  |
| 20 |                          |    |                                                                                                                                                                                                              |     |
| 21 | <b>Other information</b> |    |                                                                                                                                                                                                              |     |
| 22 | Funding                  | 22 | Give the source of funding and the role of the funders for the present study and, if applicable, for the original study on which the present article is based                                                | 13  |
| 23 |                          |    |                                                                                                                                                                                                              |     |
| 24 |                          |    |                                                                                                                                                                                                              |     |

\*Give information separately for exposed and unexposed groups.

**Note:** An Explanation and Elaboration article discusses each checklist item and gives methodological background and published examples of transparent reporting. The STROBE checklist is best used in conjunction with this article (freely available on the Web sites of PLoS Medicine at <http://www.plosmedicine.org/>, Annals of Internal Medicine at <http://www.annals.org/>, and Epidemiology at <http://www.epidem.com/>). Information on the STROBE Initiative is available at <http://www.strobe-statement.org>.

# BMJ Open

## Injury patterns in a large-scale ski resort in the host city of 2022 Winter Olympic Games: a retrospective study

|                                 |                                                                                                                                                                                                                |
|---------------------------------|----------------------------------------------------------------------------------------------------------------------------------------------------------------------------------------------------------------|
| Journal:                        | <i>BMJ Open</i>                                                                                                                                                                                                |
| Manuscript ID                   | bmjopen-2020-037834.R2                                                                                                                                                                                         |
| Article Type:                   | Original research                                                                                                                                                                                              |
| Date Submitted by the Author:   | 29-Aug-2020                                                                                                                                                                                                    |
| Complete List of Authors:       | Chen, Nayun; Peking University Third Hospital, Institute of Sports Medicine<br>Yang, Yuping; Peking University Third Hospital, Institute of Sports Medicine<br>Ao, Yingfang; Peking University Third Hospital, |
| <b>Primary Subject Heading</b>: | Sports and exercise medicine                                                                                                                                                                                   |
| Secondary Subject Heading:      | Public health                                                                                                                                                                                                  |
| Keywords:                       | SPORTS MEDICINE, PUBLIC HEALTH, Orthopaedic sports trauma < ORTHOPAEDIC & TRAUMA SURGERY                                                                                                                       |
|                                 |                                                                                                                                                                                                                |

SCHOLARONE™  
Manuscripts



I, the Submitting Author has the right to grant and does grant on behalf of all authors of the Work (as defined in the below author licence), an exclusive licence and/or a non-exclusive licence for contributions from authors who are: i) UK Crown employees; ii) where BMJ has agreed a CC-BY licence shall apply, and/or iii) in accordance with the terms applicable for US Federal Government officers or employees acting as part of their official duties; on a worldwide, perpetual, irrevocable, royalty-free basis to BMJ Publishing Group Ltd ("BMJ") its licensees and where the relevant Journal is co-owned by BMJ to the co-owners of the Journal, to publish the Work in this journal and any other BMJ products and to exploit all rights, as set out in our [licence](#).

The Submitting Author accepts and understands that any supply made under these terms is made by BMJ to the Submitting Author unless you are acting as an employee on behalf of your employer or a postgraduate student of an affiliated institution which is paying any applicable article publishing charge ("APC") for Open Access articles. Where the Submitting Author wishes to make the Work available on an Open Access basis (and intends to pay the relevant APC), the terms of reuse of such Open Access shall be governed by a Creative Commons licence – details of these licences and which [Creative Commons](#) licence will apply to this Work are set out in our licence referred to above.

Other than as permitted in any relevant BMJ Author's Self Archiving Policies, I confirm this Work has not been accepted for publication elsewhere, is not being considered for publication elsewhere and does not duplicate material already published. I confirm all authors consent to publication of this Work and authorise the granting of this licence.

1  
2  
3  
4 1 Injury patterns in a large-scale ski resort in the host city of 2022 Winter

5  
6  
7 2 Olympic Games: a retrospective study

8  
9 3 Chen Nayun<sup>1\*</sup>, Yang Yuping<sup>1\*</sup>, Ao Yingfang<sup>1</sup>

10  
11  
12 4 1. Peking University Third Hospital, Peking University Institute of Sports

13  
14 5 Medicine

15  
16  
17 6 \* They contribute equally to this article.

18  
19  
20 7 Corresponding Author: Ao Yingfang

21  
22 8 E-mail: [aoyingfang@163.com](mailto:aoyingfang@163.com)

23  
24  
25 9 Running title: Injury pattern in Chinese ski resort

26  
27  
28 10 Word Count : 2848



1  
2  
3  
4 23 Abstract

5  
6 24 Objective: The aim of the study is to describe the injury patterns in  
7  
8  
9 25 recreational skiers and snowboarders in China, and to provide the primitive  
10  
11 26 data to guide the restructure of regional health care facility to deal with the  
12  
13  
14 27 increasing number of participants in snow sports. The secondary goal is to  
15  
16  
17 28 compare injury patterns in different subgroups.

18  
19 29 Design: Retrospective study

20  
21  
22 30 Methods: A retrospective study was performed in Wanlong Ski Resort in  
23  
24  
25 31 Chongli. The data of all injured skiers and snowboarders treated in the resort  
26  
27 32 clinic during season 2018-2019 was collected. Patients information, including  
28  
29  
30 33 sex, age, equipment, ski level, injured body part was analyzed.

31  
32 34 Results: A total of 753 sports injuries were recorded. The estimated incidence  
33  
34  
35 35 of injury was 1.98 per 1000 skier days. 453 cases (60.2%) were associated  
36  
37  
38 36 with skiing. The mean age of skiers was older than snowboarders ( $35.1 \pm 14.5$   
39  
40 37 vs.  $29.0 \pm 8.9$ ,  $p < 0.01$ ). Injury not involving others took up 67.9% of all injuries.  
41  
42  
43 38 The most common injured body part in skiers was lower extremity injuries;  
44  
45  
46 39 while in snowboarders, it was upper extremity injuries. Head and cervical  
47  
48 40 injury was identified in 13.7% of skiers and 13.6% of snowboarders.

49  
50  
51 41 Conclusion: The incidence of skiing/snowboarding injury in China is similar to  
52  
53 42 previous studies. The injury pattern differs according to different sports and  
54  
55  
56 43 cause of injury.

57  
58 44 Key words: Sports injury, Skiing, Snowboarding  
59  
60

1  
2  
3  
4 45 Strength and limitations of this study:  
5

6 46 1. Since Beijing was selected to host the 2022 Winter Olympics, skiing and  
7  
8  
9 47 snowboarding population in China has risen rapidly. The present study is the  
10  
11  
12 48 first epidemiological study investigating the injury patterns in Chinese ski  
13  
14 49 resort.  
15

16  
17 50 2. This study provided evidence for restructuring the local hospital in the host  
18  
19  
20 51 city of 2022 Winter Olympic Games.  
21

22 52 3. Several limitations exist in this study. The severity of injury and accurate  
23  
24  
25 53 diagnosis were not recorded, patients were not followed up for their  
26  
27  
28 54 prognosis. There were still patients who went to local or superior hospitals  
29  
30  
31 55 directly, or did not receive any type of medical help for mild injuries. In this  
32  
33 56 case, the incidence of injury may be underestimated.  
34

35 57

36  
37 58

38  
39  
40 59

41  
42 60

43  
44  
45 61

46  
47 62

48  
49  
50 63

51  
52 64

53  
54  
55 65

56  
57 66

58  
59  
60

## 1. Introduction

Skiing and snowboarding are popular winter sports world-wide but carry a substantial risk of sports injuries, with reported incidence of 0.5-1.35 injuries per 1000 skier/snowboarder days in recreational skiers/snowboarders<sup>1-3</sup> and 6.9 injuries per 1000 runs (or 26.8 injuries per 100 athletes per season)<sup>4</sup> in professional alpine skiers in recent years. In the latest Winter Olympic Games in PyeongChang, 12% of the athletes incurred at least one injury, equaling 12.6 injuries per 100 athletes over the 17-day period<sup>5</sup>.

Since Beijing was selected to host the 2022 Winter Olympics, skiing and snowboarding population in China has risen from 8 million in 2015 to 13.2 million in 2018 (industry annual report, 2019). The skiing population in China concentrates in developed areas; however, large-scale ski resorts in China are often located in areas remote from major cities. Undoubtedly, hospitals close to ski resorts have confronted an increasing number of injured skiers and snowboarders. It is important that regional facilities are equipped to ingest large number of patients and manage severe injuries.

The aim of the study is to describe the injury patterns in recreational skiers and snowboarders in China by investigating the largest ski resort in the host city of 2022 Winter Olympic Games, and to provide the primitive data to guide the restructure of the local hospital to deal with the increasing number of participants in snow sports. The secondary goal is to compare injury patterns in different subgroups.

## 89 2. Patients and Methods

90 The data of this retrospective study was collected from the resort clinic of  
91 Wanlong Ski Resort in Chongli during ski season 2018-2019. Wanlong Ski  
92 Resort is a destination ski resort in Northern China, which has various terrain  
93 and the largest number of annual visits. The resort clinic is staffed by a  
94 registered general practitioner and a nurse, and is responsible for the primary  
95 care of all injured visitors, whether self-present or sent by patrols; it is also  
96 responsible for treating mild injury, transferring patients to local hospital,  
97 carrying out basic life support for life-threatening injuries. The season of 2018-  
98 2019 in Wanlong Ski Resort lasted for 158 days, from 2018/11/1-2019/4/7. A  
99 total of 388606 visits (379503 skier days) were recorded.

100 Besides patient's name, sex and age, we also recorded equipment, skill  
101 level, the date and time of injury, the cause of injury, the slope difficulty and  
102 the injured body part. Equipment was classified into skis and snowboards.  
103 Special equipment, such as cross-country skis, skiboards, was rare in China  
104 and not seen in recorded injured people. According to self-reported years of  
105 participation in skiing and snowboarding, patients were classified as beginner  
106 (first season), medium (1-5 years), advanced (5-10 years) and expert ( $\geq 10$   
107 years). The date of injury was divided into weekdays and weekends/holidays  
108 according to the Chinese government holiday arrangement. The business  
109 hour of Wanlong Ski Resort is 8:00-16:00, so we split the time of injury into 4  
110 periods with 2 hours each, morning (first 2 hours of business), noon,

1  
2  
3  
4 111 afternoon and late afternoon (last 2 hours of business). According to the  
5  
6 112 subjective description of injury scene, we summarized 2 types of causes of  
7  
8  
9 113 injury: not involving others, defined as falling or crashing without any body  
10  
11  
12 114 contact with others; and involving others, defined as crashing involving 2 or  
13  
14 115 more people. The slope difficulty was categorized into beginner trail, medium  
15  
16  
17 116 trail and advanced trail according to the official data of slope inclination angle.  
18  
19 117 Injured body parts were categorized into the following 4 anatomical body  
20  
21  
22 118 regions: (1) head/cervical, (2) torso, (3) upper extremity, and (4) lower  
23  
24  
25 119 extremity. Acromioclavicular joint injuries were classified as upper limb injury,  
26  
27 120 while other clavicle injuries were classified as torso injuries.<sup>6</sup> Injuries involving  
28  
29  
30 121 gluteal region were classified as torso injury. Whether patients have multi-part  
31  
32  
33 122 injuries was also recorded, while each injured body part was counted in one of  
34  
35  
36 123 the above groups. The relationship between injured body part and sex, age,  
37  
38 124 equipment and cause of injury was further determined by subgroup analysis.

39  
40 125 The present study is epidemiological and anonymous, therefore informed  
41  
42  
43 126 consent was not applicable. This study was approved by Peking University  
44  
45  
46 127 Third Hospital Medical Science Research Ethics Committee.

#### 47 48 128 Statistical analysis

49  
50 129 All statistical analysis was performed with SPSS (v 24.0; IBM Corp).  
51  
52  
53 130 Continuous variables were presented as mean and standard deviations, while  
54  
55  
56 131 categorical data were presented with frequency count and percentages. To do  
57  
58  
59 132 comparison between subgroups, Chi-squared test was used for categorical  
60

1  
2  
3  
4 133 variables and student t test was used for continuous variables. When there is  
5  
6 134 missing data, the available case was analyzed to determine difference  
7  
8  
9 135 between groups.  $P < 0.05$  was considered to indicate statistical significance.  
10

### 11 136 3. Results

12  
13  
14 137 During the study period, there were 388606 visits (379503 skier days) and  
15  
16  
17 138 753 cases of injury recorded in Wanlong Ski Resort. The estimated incidence  
18  
19 139 of injury was 1.98 per 1000 skier days.  
20

#### 21 140 Features of injury

22  
23  
24 141 The mean age of injured visitors was  $32.5 \pm 12.9$  years (range 3-73 years).  
25  
26  
27 142 Pediatric patients under 15 years old took up 9.3%, while senior patients (over  
28  
29 143 the age of 60) took up 3.0% of all injured population. The number of males  
30  
31 144 was twice as females. Among these injuries, 453 cases (60.2%) were  
32  
33 145 associated with skiing. Table 1 shows more detailed demographic and sport-  
34  
35 146 related profiles of these injuries.  
36  
37  
38  
39

40 147 The season of 2018-2019 in Wanlong Ski Resort consisted of 107  
41  
42 148 weekdays and 51 weekends/holidays according to the Chinese government  
43  
44 149 arrangement. The average daily number of injuries was 3.38 on weekdays  
45  
46 150 and 7.65 on weekends/holidays. A peak of pediatric cases was noted in  
47  
48 151 January and February (Figure 1). Within a day, the percentage of injury  
49  
50 152 occurred in morning, noon, afternoon and late afternoon was 9.7%, 31.6%,  
51  
52 153 22.0% and 36.7% respectively.  
53  
54  
55  
56  
57  
58  
59  
60

1  
2  
3  
4 154 Accidents not involving others took up 67.9% of all injuries. The most  
5  
6 155 common injured body parts were upper and lower limbs, which made up  
7  
8  
9 156 28.4% and 37.6% of all injuries respectively. Head and cervical injuries also  
10  
11  
12 157 took up a notable portion of injuries (13.1%).

#### 13 14 158 Injury pattern in subgroups

15  
16  
17 159 The mean age of skiers was  $35.1 \pm 14.5$  years, whereas the mean age of  
18  
19 160 snowboarders was  $29.0 \pm 8.9$  years ( $p < 0.01$ ). There was no significant  
20  
21  
22 161 difference in the sex profile between skiers and snowboarders.

23  
24 162 The injured body parts showed different patterns between skiers and  
25  
26  
27 163 snowboarders. More than half of the patients injured while skiing sustained  
28  
29  
30 164 lower extremity injuries, while the most common injury in snowboarders was  
31  
32  
33 165 upper extremity injury. Head and cervical injury was identified in 13.7% of  
34  
35 166 skiers and 13.6% of snowboarders. Multipart injury took up 5.3% in skiers and  
36  
37  
38 167 3.4% in snowboarders (Table 2). The cause of injury was also found to be  
39  
40  
41 168 related with the injured body parts in both skiers and snowboarders. Head  
42  
43  
44 169 injury took up a significantly more portion in accidents involving others. In  
45  
46  
47 170 skiers, lower extremity injury had the highest rate in both accidents involving  
48  
49  
50 171 others and accidents not involving others, while the rate was significantly  
51  
52  
53 172 higher in accidents not involving others (Table 3). In snowboarders, head,  
54  
55  
56 173 cervical and torso injury took up a greater portion in accidents involving others  
57  
58  
59 174 (Table 4). The correlation between age, sex, skill level and injured body parts  
60  
175 was not significant. (Supplementary Tables 5-10)

1  
2  
3  
4 176

5  
6 177 4. Discussion

7  
8  
9 178 We found that the incidence of snow sports related injury of recreational  
10  
11 179 skiing and snowboarding population in China's largest ski resort was 1.98 per  
12  
13 180 1000 skier days, which was comparable to reported injury incidence of 0.5-3.7  
14  
15 181 per 1000 skier days in European and North American countries in recent  
16  
17 182 years.<sup>1,7-9</sup> According to the government report, the total number of visits in ski  
18  
19 183 resorts in Chongli hit nearly 1 million in the 2018-19 ski season, which means  
20  
21 184 an estimated number of 2,000 sports injuries per season if such finding is  
22  
23 185 extrapolated to the whole region. Therefore, a better understanding of injury  
24  
25 186 pattern in Chinese population will guide the reform of local health care facility  
26  
27 187 and help dealing with the seasonal increase of sports injury.

28  
29  
30 188 The mean age of injured visitors was 32.5±12.9 years (range 3-73 years),  
31  
32 189 with 9.3% younger than 15 years old. In china, winter vacation for teenage  
33  
34 190 students lasts for about 4 weeks around Chinese New Year, which creates  
35  
36 191 a peak of teenage visitors to Chongli in January and February. We found  
37  
38 192 that sports injury in teenagers concentrated in January and February, and  
39  
40 193 took up nearly 15% of injuries occurred in these two months. The incidence  
41  
42 194 of ski injury was reported higher in teenagers than in adults.<sup>10</sup> An increase  
43  
44 195 of pediatric patients of snow sports injury will be seen in the future, as more  
45  
46 196 young people participate in these activities.  
47  
48  
49  
50  
51  
52  
53  
54  
55  
56  
57  
58  
59  
60



1  
2  
3  
4 197 Previous studies found female skiers are more susceptible to lower  
5  
6 198 extremity injury, especially knee injuries, with nearly 50% of injured females  
7  
8  
9 199 suffer from knee injury.<sup>11</sup> The present study found similar rate of females  
10  
11 200 suffering from lower extremity injuries in skiing population; however, there  
12  
13  
14 201 was no significant difference in injured body parts between males and  
15  
16  
17 202 females in both sports groups. Paolo G et al.<sup>12</sup> found that men experienced  
18  
19 203 more severe injuries than women, which may result from higher speed,  
20  
21  
22 204 body weight and trail difficulty in men.

23  
24 205 Snowboarding accounted for nearly 40% of the injured population in the  
25  
26  
27 206 latest season. Based on the previously published data, an increase of the  
28  
29  
30 207 percentage of snowboarders in total and injured winter sport population has  
31  
32  
33 208 been noticed.<sup>7,13</sup> Derived from skateboarding in 1970s, this young sport  
34  
35 209 appeals to more young people and at the same time, reshapes the injury  
36  
37  
38 210 profile. In a study conducted in Big Sky area in United States, snowboarders  
39  
40  
41 211 took up 42.8% of injured visitors in the 2009-2010 season, while between  
42  
43 212 1995 and 2000 only 23.0% of injured people were snowboarders.<sup>14</sup> Many  
44  
45 213 studies reported that snowboarders had significantly more injuries to the  
46  
47  
48 214 head, spine and upper extremity when compared with skiers, whereas skiers  
49  
50  
51 215 sustained significantly more lower extremity injuries.<sup>7,14,15</sup> The present study  
52  
53 216 revealed the same patterns, with higher rates of head, upper extremity injuries  
54  
55  
56 217 in snowboarders, and lower rates of lower extremity injuries. In a study  
57  
58 218 comparing injury severity in different sports, the authors reported that the  
59  
60

1  
2  
3  
4 219 percentage of mild, moderate and severe injuries in skiing were 41%, 44%  
5  
6 220 and 15% respectively, while the percentage in snowboarding were 34%, 53%  
7  
8  
9 221 and 13%.<sup>9</sup> Maat SC et al. <sup>15</sup>reported that skiers were more seriously injured  
10  
11 222 with Injury Severity Scale (ISS) higher than 9.  
12  
13

14 223 Beginners and medium level skiers (63.5%) and snowboarders (81.4%)  
15  
16 224 made up the majority of injured visitors. In a study involving 19539 injured  
17  
18 225 snowboarders in Japan, proportions of the trunk and multiple injuries were  
19  
20 226 found to increase with higher skill level; the injury severity was also found to  
21  
22 227 increase with skill level.<sup>16</sup> Another study found no relationship between skill  
23  
24 228 level and injury severity in skiing and snowboarding population once  
25  
26 229 unconscious patients (who cannot report their skill level) were ruled out.<sup>13</sup>  
27  
28  
29

30 230 Over two thirds of the injuries did not involve others, which is lower than  
31  
32 231 the reported rate of self-inflicted injury on Austrian ski slopes.<sup>3</sup> The  
33  
34 232 difference are likely attributed to the higher density of skiers/snowboarders  
35  
36 233 on the slope in China compared with other countries, which is implied by the  
37  
38 234 fact that the rate of crash accident was extremely high on medium trails.  
39  
40 235 (Supplementary Table11) Yet, no available studies provide conclusive  
41  
42 236 evidence of the influence factors of self-inflicted and crash injury rate.<sup>17</sup> The  
43  
44 237 cause of injury was also found to be related with the injured body parts in  
45  
46 238 both skiers and snowboarders. Head injury took up a significantly more  
47  
48 239 portion in accidents involving others. Sport-specific injuries, such as  
49  
50 240 shoulder injury in snowboarding and knee injury in skiing,<sup>7</sup> were more  
51  
52  
53  
54  
55  
56  
57  
58  
59  
60

1  
2  
3  
4 241 frequent in accidents not involving others. These findings can be attributed  
5  
6 242 to different injury mechanism prevalent in various traumatic setting, with  
7  
8  
9 243 non-contact injury often causing ligament and tendon sprains or tears,  
10  
11 244 contact injury causing bony injury and concussion.<sup>18</sup>  
12  
13

14 245 From an epidemiological view, the present study provides strategies that  
15  
16 246 can guide the restructure of local hospital and unload the burden in winter  
17  
18 247 season. First, establish pediatric orthopedic department to cope with the  
19  
20 248 pediatric patients who take up nearly 10% of the whole injury population,  
21  
22 249 especially the surge during winter vacation in China. Second, establish  
23  
24 250 department of neurosurgery and department of oral and maxillofacial surgery  
25  
26 251 in order to deal with the head and face injury, which took up to 13% of all  
27  
28 252 injuries. Third, rearrange the worktime schedule according to the time-related  
29  
30 253 “tide” of winter sports injury to increase effectiveness with limited manpower.  
31  
32 254 For example, change weekends into work days and set other rest days in  
33  
34 255 winter season to cope with the traumatic cases in weekend which are twice as  
35  
36 256 many as in weekdays. Fourth, intensive care unit is crucial to manage severe  
37  
38 257 injuries as the population of snowboarders, higher skill level and young  
39  
40 258 participant grow bigger, because these populations are at higher risk of  
41  
42 259 severe injuries according to previous studies. Fifth, build up communication  
43  
44 260 and cooperation network with nearby ski resorts to allow access to critical  
45  
46 261 patient’s information in advance and guide prehospital care. Although the  
47  
48 262 present study did not provide information about injury severity and number of  
49  
50  
51  
52  
53  
54  
55  
56  
57  
58  
59  
60

1  
2  
3  
4 263 patients who need transfer and further treatment, up to 60% of injured skiers  
5  
6 264 and snowboarders seen in resort clinic require transfer to hospital based on  
7  
8  
9 265 existing literature.<sup>9</sup> Up to now, the local hospital in Chongli has reinforced its  
10  
11 266 orthopedics and sports medicine department by seeking cooperation with  
12  
13  
14 267 superior hospitals in Beijing. An evidence-based restructure of local hospital  
15  
16  
17 268 may increase the accessibility to health care for injured skiers and  
18  
19 269 snowboarders in nearby ski resorts.

20  
21  
22 270 Several limitations exist in this study. First, the severity of injury and  
23  
24 271 accurate diagnosis were not recorded, patients were not followed up for their  
25  
26  
27 272 prognosis. Second, although medical providers in ski resort have collected  
28  
29  
30 273 injury cases as through as possible, there were still patients who went to local  
31  
32 274 or superior hospitals directly, or did not receive any type of medical help for  
33  
34  
35 275 mild injuries. In this case, the incidence of injury may be underestimated.  
36  
37 276 Additionally, the injury severity and number of patients who needed transfer  
38  
39  
40 277 was incomplete, so we were unable to estimate the burden of local hospital in  
41  
42  
43 278 skiing season. Currently, we are conducting a large-scale survey on the  
44  
45  
46 279 demography of Chinese winter sports participants, and a prospective research  
47  
48 280 of winter sports injury in skiing population in China to fill the gap. The  
49  
50 281 effectiveness of hospital restructure will be reported as well.

## 53 282 5. Patient and public involvement

54  
55  
56 283 It was not appropriate to involve patients or the public in the design, or  
57  
58 284 conduct, or reporting, or dissemination plans of our research.  
59  
60

1  
2  
3  
4 285 6. Acknowledgement

5  
6 286 The medical director of Wanlong Ski Resort, Zhang Jinwei, provided help in  
7  
8  
9 287 the collection of injury data.

10  
11 288 7. Funding

12  
13  
14 289 This work was supported by the National Key Research and Development  
15  
16  
17 290 Program of China [2018YFF0301100].

18  
19 291 8. Conflicts of interest

20  
21  
22 292 The author states no conflicts of interest.

23  
24 293 9. Author Contributions

25  
26  
27 294 Chen Nayun carried out the data analysis and drafted the manuscript. Yang  
28  
29  
30 295 Yuping carried out the design of patient information registration chart, and  
31  
32  
33 296 helped to draft the manuscript. Ao Yingfang conceived of the study, and  
34  
35  
36 297 participated in its design.

37  
38 298 10. Data availability statement

39  
40 299 The data in the present study is deidentified participant data which are  
41  
42  
43 300 available upon reasonable request. Please contact the first author for  
44  
45  
46 301 permission to reuse the original data. Email: albert\_west@163.com

47  
48 302 11. Reference

49  
50  
51 303 1. Ekeland A, Johnson RJ, Shealy J, Senner V, Dean SW. Skiing and  
52  
53 304 boarding injuries on Norwegian slopes during two winter seasons.  
54  
55  
56 305 Journal of ASTM International. 2010;7(4).

57  
58 306 2. Castellani C, Singer G, Eibisberger M, et al. An epidemiologic analysis  
59  
60

- 1  
2  
3  
4 307 of winter sport accidents on ski slopes comparing two seasons. *J Sports*  
5  
6 308 *Med Phys Fitness*. 2019;59(4):648-654.
- 7  
8  
9 309 3. Ruedl G, Philippe M, Sommersacher R, Dunnwald T, Kopp M, Burtscher  
10  
11 310 M. [Current incidence of accidents on Austrian ski slopes]. *Sportverletz*  
12  
13 311 *Sportschaden*. 2014;28(4):183-187.
- 14  
15  
16  
17 312 4. Haaland B, Steenstrup SE, Bere T, Bahr R, Nordsletten L. Injury rate  
18  
19 313 and injury patterns in FIS World Cup Alpine skiing (2006-2015): have the  
20  
21 314 new ski regulations made an impact? *Br J Sports Med*. 2016;50(1):32-  
22  
23 315 36.
- 24  
25  
26  
27 316 5. Soligard T, Palmer D, Steffen K, et al. Sports injury and illness incidence  
28  
29 317 in the PyeongChang 2018 Olympic Winter Games: a prospective study  
30  
31 318 of 2914 athletes from 92 countries. *Br J Sports Med*. 2019;53(17):1085-  
32  
33 319 1092.
- 34  
35  
36  
37 320 6. Asadollahi S, Bucknill A. Acute medial clavicle fracture in adults: a  
38  
39 321 systematic review of demographics, clinical features and treatment  
40  
41 322 outcomes in 220 patients. *J Orthop Traumatol*. 2019;20(1):24.
- 42  
43  
44  
45 323 7. Kim S, Endres NK, Johnson RJ, Ettlinger CF, Shealy JE. Snowboarding  
46  
47 324 injuries: trends over time and comparisons with alpine skiing injuries. *Am*  
48  
49 325 *J Sports Med*. 2012;40(4):770-776.
- 50  
51  
52  
53 326 8. Langran M, Selvaraj S. Snow sports injuries in Scotland: a case-control  
54  
55 327 study. *Br J Sports Med*. 2002;36(2):135-140.
- 56  
57  
58 328 9. Stenroos A, Handolin L. Incidence of Recreational Alpine Skiing and  
59  
60

- 1  
2  
3  
4 329 Snowboarding Injuries: Six Years Experience in the Largest Ski Resort  
5  
6 330 in Finland. *Scand J Surg.* 2015;104(2):127-131.  
7  
8  
9 331 10. Provance AJ, Daoud AK, Tagawa A, Rhodes J. Pediatric and adolescent  
10  
11 332 injury in skiing. *Res Sports Med.* 2018;26(sup1):150-165.  
12  
13  
14 333 11. Ruedl G, Linortner I, Schranz A, et al. Distribution of injury mechanisms  
15  
16 334 and related factors in ACL-injured female carving skiers. *Knee Surg*  
17  
18 335 *Sports Traumatol Arthrosc.* 2009;17(11):1393-1398.  
19  
20  
21  
22 336 12. Girardi P, Braggion M, Sacco G, De Giorgi F, Corra S. Factors affecting  
23  
24 337 injury severity among recreational skiers and snowboarders: an  
25  
26 338 epidemiology study. *Knee Surg Sports Traumatol Arthrosc.*  
27  
28 339 2010;18(12):1804-1809.  
29  
30  
31  
32 340 13. Coury T, Napoli AM, Wilson M, Daniels J, Murray R, Milzman D. Injury  
33  
34 341 patterns in recreational alpine skiing and snowboarding at a  
35  
36 342 mountainside clinic. *Wilderness Environ Med.* 2013;24(4):417-421.  
37  
38  
39  
40 343 14. Wasden CC, McIntosh SE, Keith DS, McCowan C. An analysis of skiing  
41  
42 344 and snowboarding injuries on Utah slopes. *J Trauma.* 2009;67(5):1022-  
43  
44 345 1026.  
45  
46  
47  
48 346 15. Maat SC, Luppino FS, Schipper IB, Krijnen P, Bartlema KA. Injury  
49  
50 347 patterns after skiing and snowboarding sports accidents. *J Sports Med*  
51  
52 348 *Phys Fitness.* 2020;60(1):119-124.  
53  
54  
55  
56 349 16. Ogawa H, Sumi H, Sumi Y, Shimizu K. Skill level-specific differences in  
57  
58 350 snowboarding-related injuries. *Am J Sports Med.* 2010;38(3):532-537.  
59  
60

- 1  
2  
3  
4 351 17. Ruedl G, Kopp M, Burtscher M, Bauer R, Benedetto K. [Causes and  
5  
6 352 factors associated with collisions on ski slopes]. *Sportverletz*  
7  
8  
9 353 *Sportschaden*. 2013;27(2):100-104.  
10  
11 354 18. Davey A, Endres NK, Johnson RJ, Shealy JE. Alpine Skiing Injuries.  
12  
13  
14 355 *Sports Health*. 2019;11(1):18-26.  
15  
16  
17 356  
18  
19  
20 357  
21  
22 358 Tables and Figures  
23  
24  
25 359 Table 1. Demographic and sport-related information of injured population

|                  | n (%)       |
|------------------|-------------|
| <b>Sex</b>       |             |
| Male             | 475 (63.3%) |
| Female           | 278 (36.7%) |
| <b>Age</b>       |             |
| <15 years        | 68 (9.3%)   |
| 15-60 years      | 643 (87.7%) |
| >60 years        | 22 (3.0%)   |
| <b>Equipment</b> |             |
| Ski              | 453 (60.6%) |
| Snowboard        | 294 (39.4%) |



| Skill level      |             |
|------------------|-------------|
| Beginner         | 211 (29.5%) |
| Medium           | 246 (34.0%) |
| Advanced         | 122(22.8%)  |
| Expert           | 64 (13.7%)  |
| Slope difficulty |             |
| Beginner trail   | 111(15.3%)  |
| Medium trail     | 206 (26.5%) |
| Advanced trail   | 425 (58.1%) |

360

361

Table 2. Details of injured skiers and snowboarders

|                    | Skiers<br>(n=453) | Snowboarders<br>(n=294) | P value |
|--------------------|-------------------|-------------------------|---------|
| Sex, n (%)         |                   |                         |         |
| Male               | 281 (63.3%)       | 184 (62.6%)             | 0.846   |
| Female             | 163 (36.7%)       | 110 (37.4%)             |         |
| Age, n (%)         |                   |                         |         |
| <15 years          | 44 (10.3%)        | 22 (7.5%)               | <0.01*  |
| 15-60 years        | 363 (84.6%)       | 270 (92.5%)             |         |
| >60 years          | 22 (5.1%)         | 0 (0%)                  |         |
| Skill level, n (%) |                   |                         |         |

|    |                          |             |             |        |
|----|--------------------------|-------------|-------------|--------|
| 1  |                          |             |             |        |
| 2  |                          |             |             |        |
| 3  |                          |             |             |        |
| 4  | Beginner                 | 110 (29.5%) | 101 (37.5%) | <0.01* |
| 5  |                          |             |             |        |
| 6  | Medium                   | 127 (34.0%) | 118 (43.9%) |        |
| 7  |                          |             |             |        |
| 8  |                          |             |             |        |
| 9  | Advanced                 | 85 (22.8%)  | 37 (13.8%)  |        |
| 10 |                          |             |             |        |
| 11 | Expert                   | 51 (13.7%)  | 13 (4.8%)   |        |
| 12 |                          |             |             |        |
| 13 |                          |             |             |        |
| 14 | Date of Injury, n (%)    |             |             |        |
| 15 |                          |             |             |        |
| 16 | Weekdays                 | 223 (50.2%) | 134 (45.7%) | 0.232  |
| 17 |                          |             |             |        |
| 18 | Weekends/Holidays        | 221 (49.8%) | 159 (54.3%) |        |
| 19 |                          |             |             |        |
| 20 |                          |             |             |        |
| 21 |                          |             |             |        |
| 22 | Time of injury, n (%)    |             |             |        |
| 23 |                          |             |             |        |
| 24 | Morning                  | 44 (10.1%)  | 28 (9.9%)   | 0.466  |
| 25 |                          |             |             |        |
| 26 | Noon                     | 137 (31.6%) | 89 (31.3%)  |        |
| 27 |                          |             |             |        |
| 28 | Afternoon                | 86 (19.8%)  | 69 (24.3%)  |        |
| 29 |                          |             |             |        |
| 30 | Late afternoon           | 167 (38.5%) | 98 (34.5%)  |        |
| 31 |                          |             |             |        |
| 32 |                          |             |             |        |
| 33 |                          |             |             |        |
| 34 |                          |             |             |        |
| 35 | Slope difficulty, n (%)  |             |             |        |
| 36 |                          |             |             |        |
| 37 | Beginner trail           | 67 (15.3%)  | 42 (14.4%)  | 0.868  |
| 38 |                          |             |             |        |
| 39 | Medium trail             | 116 (26.5%) | 82 (28.2%)  |        |
| 40 |                          |             |             |        |
| 41 | Advanced trail           | 254 (58.1%) | 167 (57.4%) |        |
| 42 |                          |             |             |        |
| 43 |                          |             |             |        |
| 44 |                          |             |             |        |
| 45 | Cause of injury, n (%)   |             |             |        |
| 46 |                          |             |             |        |
| 47 | Involving others         | 153 (32.5%) | 97 (30.6%)  | 0.680  |
| 48 |                          |             |             |        |
| 49 | Not involving others     | 291 (67.5%) | 197 (69.4%) |        |
| 50 |                          |             |             |        |
| 51 |                          |             |             |        |
| 52 |                          |             |             |        |
| 53 | Injured body part, n (%) |             |             |        |
| 54 |                          |             |             |        |
| 55 | Head and cervical        | 57 (13.7%)  | 36 (13.6%)  | <0.01* |
| 56 |                          |             |             |        |
| 57 | Torso                    | 83 (19.9%)  | 63 (23.8%)  |        |
| 58 |                          |             |             |        |
| 59 |                          |             |             |        |
| 60 |                          |             |             |        |

|                 |             |             |
|-----------------|-------------|-------------|
| Upper extremity | 79 (18.9%)  | 125 (47.2%) |
| Lower extremity | 222 (53.2%) | 50 (18.9%)  |
| Multipart       | 22 (5.3%)   | 9 (3.4%)    |

362

363

364

365 Table 3. The relationship between cause of injury and injured body part in

366 skiers

|                   | Injury not<br>involving others<br>(n=291) | Injury involving<br>others<br>(n=126) | P value |
|-------------------|-------------------------------------------|---------------------------------------|---------|
| Head and cervical | 21(7.2%)                                  | 36(28.6%)                             | <0.01   |
| Torso             | 54(18.6%)                                 | 29(23.0%)                             |         |
| Upper extremity   | 53(18.2%)                                 | 26(20.6%)                             |         |
| Lower extremity   | 172(59.1%)                                | 50(49.7%)                             |         |
| Multipart injury  | 9(3.1%)                                   | 13(10.3%)                             |         |

367

368 Table 4. The relationship between cause of injury and injured body part in

369 snowboarders

|  | Injury not<br>involving others<br>(n=197) | Injury involving<br>others<br>(n=68) | P value |
|--|-------------------------------------------|--------------------------------------|---------|
|  |                                           |                                      |         |

|                   |            |           |       |
|-------------------|------------|-----------|-------|
| Head and cervical | 17(8.6%)   | 19(27.9%) | <0.01 |
| Torso             | 39(19.8%)  | 24(35.3%) |       |
| Upper extremity   | 107(54.3%) | 18(26.5%) |       |
| Lower extremity   | 37(18.8%)  | 13(19.1%) |       |
| Multipart injury  | 3(1.5%)    | 6(8.8%)   |       |

370

371 Figure 1. Number of injury cases in differet age group during the season of

372 2018-2019.

373

1  
2  
3  
4  
5  
6  
7  
8  
9  
10  
11  
12  
13  
14  
15  
16  
17  
18  
19  
20  
21  
22  
23  
24  
25  
26  
27  
28  
29  
30  
31  
32  
33  
34  
35  
36  
37  
38  
39  
40  
41  
42  
43  
44  
45  
46  
47  
48  
49  
50  
51  
52  
53  
54  
55  
56  
57  
58  
59  
60

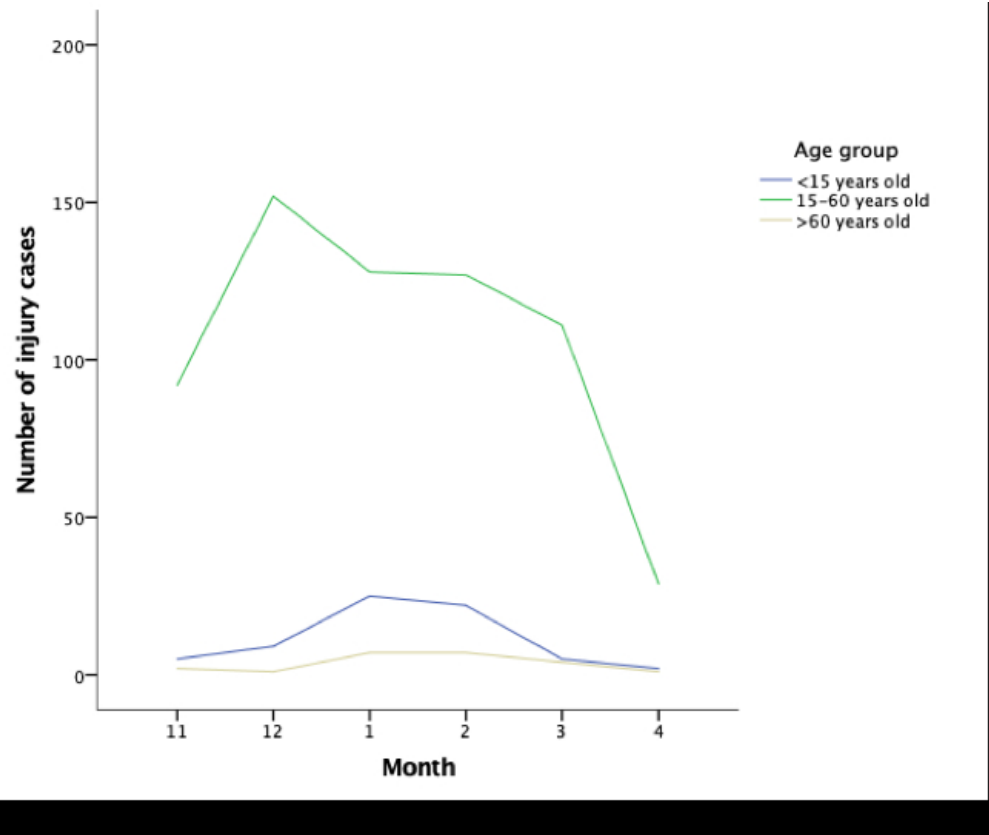

Figure 1. Number of injury cases in differet age group during the season of 2018-2019.

Table 5. The relationship between sex and injured body part in skiers

|                   | Male<br>(n=260) | Female<br>(n=158) | P value |
|-------------------|-----------------|-------------------|---------|
| Head and cervical | 32(12.3%)       | 25(15.8%)         | 0.29    |
| Torso             | 58(22.3%)       | 24(15.2%)         |         |
| Upper extremity   | 51(19.6%)       | 28(17.7%)         |         |
| Lower extremity   | 131(50.4%)      | 91(57.6%)         |         |
| Multipart injury  | 12(4.6%)        | 10(6.3%)          |         |

Table 6 The relationship between sex and injured body part in snowboarders

|                   | Male<br>(n=158) | Female<br>(n=107) | P value |
|-------------------|-----------------|-------------------|---------|
| Head and cervical | 21(13.3%)       | 15(14.0%)         | 0.63    |
| Torso             | 42(25.6%)       | 21(19.6%)         |         |
| Upper extremity   | 74(46.8%)       | 51(47.7%)         |         |
| Lower extremity   | 26(16.5%)       | 24(22.4%)         |         |
| Multipart injury  | 5(3.2%)         | 4(3.7%)           |         |

Table 7. The relationship between age and injured body part in skiers

|                   | Teenager<br>(n=52) | Adult<br>(n=329) | Elderly<br>(n=22) | P value |
|-------------------|--------------------|------------------|-------------------|---------|
| Head and cervical | 15(28.8%)          | 39(11.9%)        | 2(9.1%)           | 0.14    |
| Torso             | 6(11.5%)           | 70(21.3%)        | 4(18.2%)          |         |
| Upper extremity   | 12(23.1%)          | 57(17.3%)        | 8(36.4%)          |         |
| Lower extremity   | 22(42.3%)          | 179(54.4%)       | 11(50%)           |         |
| Multipart injury  | 3(5.8%)            | 16(4.9%)         | 3(13.6%)          |         |

Table 8. The relationship between age and injured body part in snowboarders

|                   | Teenager<br>(n=26) | Adult<br>(n=238) | Elderly<br>(n=0) | P value |
|-------------------|--------------------|------------------|------------------|---------|
| Head and cervical | 6(23.1%)           | 30(12.6%)        | 0                | 0.21    |
| Torso             | 4(15.4%)           | 59(25.2%)        | 0                |         |
| Upper extremity   | 15(57.7%)          | 109(45.8%)       | 0                |         |
| Lower extremity   | 2(7.7%)            | 48(20.2%)        | 0                |         |
| Multipart injury  | 1(3.8%)            | 8(3.4%)          | 0                |         |

Table 9. The relationship between skill level and injured body part in skiers

|                   | Beginner<br>(n=106) | Medium<br>(n=118) | Advanced<br>(n=79) | Expert<br>(n=49) | P value |
|-------------------|---------------------|-------------------|--------------------|------------------|---------|
| Head and cervical | 13(28.8%)           | 12(11.9%)         | 11(9.1%)           | 5(%)             | 0.19    |
| Torso             | 18(11.5%)           | 27(21.3%)         | 16(18.2%)          | 10(%)            |         |
| Upper extremity   | 22(23.1%)           | 18(17.3%)         | 15(36.4%)          | 13(%)            |         |
| Lower extremity   | 54(42.3%)           | 164(54.4%)        | 48(50%)            | 24(%)            |         |
| Multipart injury  | 2(5.8%)             | 4(4.9%)           | 9(13.6%)           | 3(%)             |         |

Table 10. The relationship between skill level and injured body part in snowboarders

|                   | Beginner<br>(n=93) | Medium<br>(n=109) | Advance<br>(n=36) | Expert<br>(n=11) | P value |
|-------------------|--------------------|-------------------|-------------------|------------------|---------|
| Head and cervical | 15(23.1%)          | 11(12.6%)         | 5                 | 1                | 0.32    |
| Torso             | 20(15.4%)          | 27(25.2%)         | 10                | 2                |         |
| Upper extremity   | 46(57.7%)          | 51(45.8%)         | 14                | 7                |         |
| Lower extremity   | 14(7.7%)           | 26(20.2%)         | 8                 | 8                |         |

Multipart injury                      2(3.8%)                      6(3.4%)                      1                      0

---

Table 11. Cause of injury and slope difficulty

|                | Self-inflicted<br>(n=486) | Crash<br>(n=226) | P value |
|----------------|---------------------------|------------------|---------|
| Beginner trail | 93                        | 18               | <0.01*  |
| Medium trail   | 103                       | 87               |         |
| Advanced trail | 292                       | 121              |         |



STROBE Statement—Checklist of items that should be included in reports of *cohort studies*

|                           | Item No | Recommendation                                                                                                                                                                                    | Page No |
|---------------------------|---------|---------------------------------------------------------------------------------------------------------------------------------------------------------------------------------------------------|---------|
| <b>Title and abstract</b> | 1       | (a) Indicate the study's design with a commonly used term in the title or the abstract                                                                                                            | 1       |
|                           |         | (b) Provide in the abstract an informative and balanced summary of what was done and what was found                                                                                               | 2       |
| <b>Introduction</b>       |         |                                                                                                                                                                                                   |         |
| Background/rationale      | 2       | Explain the scientific background and rationale for the investigation being reported                                                                                                              | 3       |
| Objectives                | 3       | State specific objectives, including any prespecified hypotheses                                                                                                                                  | 3       |
| <b>Methods</b>            |         |                                                                                                                                                                                                   |         |
| Study design              | 4       | Present key elements of study design early in the paper                                                                                                                                           | 5       |
| Setting                   | 5       | Describe the setting, locations, and relevant dates, including periods of recruitment, exposure, follow-up, and data collection                                                                   | 5       |
| Participants              | 6       | (a) Give the eligibility criteria, and the sources and methods of selection of participants. Describe methods of follow-up                                                                        | 5       |
|                           |         | (b) For matched studies, give matching criteria and number of exposed and unexposed                                                                                                               | NA      |
| Variables                 | 7       | Clearly define all outcomes, exposures, predictors, potential confounders, and effect modifiers. Give diagnostic criteria, if applicable                                                          | 5       |
| Data sources/measurement  | 8*      | For each variable of interest, give sources of data and details of methods of assessment (measurement). Describe comparability of assessment methods if there is more than one group              | 6       |
| Bias                      | 9       | Describe any efforts to address potential sources of bias                                                                                                                                         | NA      |
| Study size                | 10      | Explain how the study size was arrived at                                                                                                                                                         | NA      |
| Quantitative variables    | 11      | Explain how quantitative variables were handled in the analyses. If applicable, describe which groupings were chosen and why                                                                      | NA      |
| Statistical methods       | 12      | (a) Describe all statistical methods, including those used to control for confounding                                                                                                             | 6       |
|                           |         | (b) Describe any methods used to examine subgroups and interactions                                                                                                                               | NA      |
|                           |         | (c) Explain how missing data were addressed                                                                                                                                                       | 6       |
|                           |         | (d) If applicable, explain how loss to follow-up was addressed                                                                                                                                    | NA      |
|                           |         | (e) Describe any sensitivity analyses                                                                                                                                                             | NA      |
| <b>Results</b>            |         |                                                                                                                                                                                                   |         |
| Participants              | 13*     | (a) Report numbers of individuals at each stage of study—eg numbers potentially eligible, examined for eligibility, confirmed eligible, included in the study, completing follow-up, and analysed | 7       |
|                           |         | (b) Give reasons for non-participation at each stage                                                                                                                                              | NA      |
|                           |         | (c) Consider use of a flow diagram                                                                                                                                                                | NA      |
| Descriptive data          | 14*     | (a) Give characteristics of study participants (eg demographic, clinical, social) and information on exposures and potential confounders                                                          | 7       |
|                           |         | (b) Indicate number of participants with missing data for each variable of interest                                                                                                               | NA      |
|                           |         | (c) Summarise follow-up time (eg, average and total amount)                                                                                                                                       | NA      |
| Outcome data              | 15*     | Report numbers of outcome events or summary measures over time                                                                                                                                    | 7-8     |

|    |                          |    |                                                                                                                                                                                                              |     |
|----|--------------------------|----|--------------------------------------------------------------------------------------------------------------------------------------------------------------------------------------------------------------|-----|
| 1  | Main results             | 16 | (a) Give unadjusted estimates and, if applicable, confounder-adjusted estimates and their precision (eg, 95% confidence interval). Make clear which confounders were adjusted for and why they were included | 7-8 |
| 2  |                          |    | (b) Report category boundaries when continuous variables were categorized                                                                                                                                    | NA  |
| 3  |                          |    | (c) If relevant, consider translating estimates of relative risk into absolute risk for a meaningful time period                                                                                             | NA  |
| 4  |                          |    |                                                                                                                                                                                                              |     |
| 5  |                          |    |                                                                                                                                                                                                              |     |
| 6  |                          |    |                                                                                                                                                                                                              |     |
| 7  |                          |    |                                                                                                                                                                                                              |     |
| 8  |                          |    |                                                                                                                                                                                                              |     |
| 9  | Other analyses           | 17 | Report other analyses done—eg analyses of subgroups and interactions, and sensitivity analyses                                                                                                               | NA  |
| 10 |                          |    |                                                                                                                                                                                                              |     |
| 11 | <b>Discussion</b>        |    |                                                                                                                                                                                                              |     |
| 12 |                          |    |                                                                                                                                                                                                              |     |
| 13 | Key results              | 18 | Summarise key results with reference to study objectives                                                                                                                                                     | 9   |
| 14 | Limitations              | 19 | Discuss limitations of the study, taking into account sources of potential bias or imprecision. Discuss both direction and magnitude of any potential bias                                                   | 13  |
| 15 |                          |    |                                                                                                                                                                                                              |     |
| 16 | Interpretation           | 20 | Give a cautious overall interpretation of results considering objectives, limitations, multiplicity of analyses, results from similar studies, and other relevant evidence                                   | 13  |
| 17 |                          |    |                                                                                                                                                                                                              |     |
| 18 |                          |    |                                                                                                                                                                                                              |     |
| 19 | Generalisability         | 21 | Discuss the generalisability (external validity) of the study results                                                                                                                                        | NA  |
| 20 |                          |    |                                                                                                                                                                                                              |     |
| 21 | <b>Other information</b> |    |                                                                                                                                                                                                              |     |
| 22 | Funding                  | 22 | Give the source of funding and the role of the funders for the present study and, if applicable, for the original study on which the present article is based                                                | 13  |
| 23 |                          |    |                                                                                                                                                                                                              |     |
| 24 |                          |    |                                                                                                                                                                                                              |     |

\*Give information separately for exposed and unexposed groups.

**Note:** An Explanation and Elaboration article discusses each checklist item and gives methodological background and published examples of transparent reporting. The STROBE checklist is best used in conjunction with this article (freely available on the Web sites of PLoS Medicine at <http://www.plosmedicine.org/>, Annals of Internal Medicine at <http://www.annals.org/>, and Epidemiology at <http://www.epidem.com/>). Information on the STROBE Initiative is available at <http://www.strobe-statement.org>.

# BMJ Open

## Injury patterns in a large-scale ski resort in the host city of 2022 Winter Olympic Games: a retrospective cross-section study

|                                 |                                                                                                                                                                                                                                  |
|---------------------------------|----------------------------------------------------------------------------------------------------------------------------------------------------------------------------------------------------------------------------------|
| Journal:                        | <i>BMJ Open</i>                                                                                                                                                                                                                  |
| Manuscript ID                   | bmjopen-2020-037834.R3                                                                                                                                                                                                           |
| Article Type:                   | Original research                                                                                                                                                                                                                |
| Date Submitted by the Author:   | 09-Oct-2020                                                                                                                                                                                                                      |
| Complete List of Authors:       | Chen, Nayun; Peking University Third Hospital, Institute of Sports Medicine<br>Yang, Yuping; Peking University Third Hospital, Institute of Sports Medicine<br>Jiang, Yanfang<br>Ao, Yingfang; Peking University Third Hospital, |
| <b>Primary Subject Heading</b>: | Sports and exercise medicine                                                                                                                                                                                                     |
| Secondary Subject Heading:      | Public health                                                                                                                                                                                                                    |
| Keywords:                       | SPORTS MEDICINE, PUBLIC HEALTH, Orthopaedic sports trauma < ORTHOPAEDIC & TRAUMA SURGERY                                                                                                                                         |
|                                 |                                                                                                                                                                                                                                  |

SCHOLARONE™  
Manuscripts



I, the Submitting Author has the right to grant and does grant on behalf of all authors of the Work (as defined in the below author licence), an exclusive licence and/or a non-exclusive licence for contributions from authors who are: i) UK Crown employees; ii) where BMJ has agreed a CC-BY licence shall apply, and/or iii) in accordance with the terms applicable for US Federal Government officers or employees acting as part of their official duties; on a worldwide, perpetual, irrevocable, royalty-free basis to BMJ Publishing Group Ltd ("BMJ") its licensees and where the relevant Journal is co-owned by BMJ to the co-owners of the Journal, to publish the Work in this journal and any other BMJ products and to exploit all rights, as set out in our [licence](#).

The Submitting Author accepts and understands that any supply made under these terms is made by BMJ to the Submitting Author unless you are acting as an employee on behalf of your employer or a postgraduate student of an affiliated institution which is paying any applicable article publishing charge ("APC") for Open Access articles. Where the Submitting Author wishes to make the Work available on an Open Access basis (and intends to pay the relevant APC), the terms of reuse of such Open Access shall be governed by a Creative Commons licence – details of these licences and which [Creative Commons](#) licence will apply to this Work are set out in our licence referred to above.

Other than as permitted in any relevant BMJ Author's Self Archiving Policies, I confirm this Work has not been accepted for publication elsewhere, is not being considered for publication elsewhere and does not duplicate material already published. I confirm all authors consent to publication of this Work and authorise the granting of this licence.

1  
2  
3  
4 1 Injury patterns in a large-scale ski resort in the host city of 2022 Winter

5  
6  
7 2 Olympic Games: a retrospective cross-section study

8  
9 3 Chen Nayun<sup>1\*</sup>, Yang Yuping<sup>1\*</sup>, Jiang Yanfang<sup>1</sup>, Ao Yingfang<sup>1</sup>

10  
11  
12 4 1. Peking University Third Hospital, Peking University Institute of Sports

13  
14 5 Medicine

15  
16  
17 6 \* They contribute equally to this article.

18  
19  
20 7 Corresponding Author: Ao Yingfang

21  
22 8 E-mail: [aoyingfang@163.com](mailto:aoyingfang@163.com)

23  
24  
25 9 Running title: Injury pattern in Chinese ski resort

26  
27  
28 10 Word Count : 2428

1  
2  
3  
4 23 Abstract

5  
6 24 Objective: The aim of the study is to describe the injury patterns in  
7  
8  
9 25 recreational skiers and snowboarders in China, and to provide primary data  
10  
11 26 for reconstruction of regional health care facility to deal with the increasing  
12  
13  
14 27 number of participants in snow sports.

15  
16  
17 28 Design: Retrospective cross-section study

18  
19 29 Methods: A retrospective study was performed in Wanlong Ski Resort in  
20  
21  
22 30 Chongli, China. The data of all injured skiers and snowboarders treated in the  
23  
24  
25 31 resort clinic during season 2018-2019 were collected. Patients information,  
26  
27 32 including sex, age, equipment, skill level, injured body part were analyzed.

28  
29  
30 33 Results: A total of 753 sports injuries were recorded. The estimated incidence  
31  
32  
33 34 of injury was 1.98 per 1000 skier days. 453 cases (60.2%) were associated  
34  
35  
36 35 with skiing. The mean age of skiers was older than snowboarders ( $35.1\pm 14.5$   
37  
38 36 vs.  $29.0\pm 8.9$ ,  $p<0.01$ ). Injury not involving others took up 67.9% of all injuries.  
39  
40  
41 37 The most common injured body part in skiers was lower extremity, contrary to  
42  
43 38 upper extremity in snowboarders. Head and cervical injury was identified in  
44  
45  
46 39 13.7% of skiers and 13.6% of snowboarders.

47  
48 40 Conclusion: The incidence of skiing/snowboarding injury in China was similar  
49  
50  
51 41 to other countries. The injury pattern differed among different sports and  
52  
53 42 cause of injury.

54  
55  
56 43 Key words: Sports injury, Skiing, Snowboarding

57  
58 44 Strength and limitations of this study:  
59  
60

- 1  
2  
3  
4 45 1. The present study is the first epidemiological study investigating the injury  
5  
6 46 patterns in Chinese ski resort.  
7  
8  
9 47 2. The severity of injury and accurate diagnosis were not recorded, and  
10  
11 48 patients were not followed up for their prognosis.  
12  
13  
14 49 3. The incidence of injury may be underestimated, due to the fact that patients  
15  
16 50 might visit the local or tertiary hospital instead of the resort clinic, or did not  
17  
18 51 receive any medical help for mild injuries.  
19  
20  
21  
22 52  
23  
24 53  
25  
26 54  
27  
28 55  
29  
30 56  
31  
32 57  
33  
34 58  
35  
36 59  
37  
38 60  
39  
40 61  
41  
42 62  
43  
44 63  
45  
46 64  
47  
48 65  
49  
50 66  
51  
52  
53  
54  
55  
56  
57  
58  
59  
60

## 1. Introduction

Skiing and snowboarding are popular winter sports world-wide but carry a substantial risk of sports injuries, with reported incidence of 0.5-1.35 injuries per 1000 skier/snowboarder days in recreational skiers/snowboarders<sup>1-3</sup> and 6.9 injuries per 1000 runs (or 26.8 injuries per 100 athletes per season)<sup>4</sup> in professional alpine skiers in recent years. In the latest Winter Olympic Games in PyeongChang, 12% of the athletes incurred at least one injury, equaling 12.6 injuries per 100 athletes over the 17-day period<sup>5</sup>.

Since Beijing was selected to host the 2022 Winter Olympics, skiing and snowboarding population in China has risen from 8 million in 2015 to 13.2 million in 2018 (industry annual report, 2019). Large-scale ski resorts in China are often located in areas remote from major cities where medical capacities for improvement to ingest large number of winter sports injuries and manage severe injuries.

The aim of the study is to describe the injury patterns in recreational skiers and snowboarders in China by investigating the largest ski resort in the host city of 2022 Winter Olympic Games, and to provide primary data to guide the reconstruction of the local hospital to deal with the increasing number of participants in snow sports.

## 2. Patients and Methods

The data of this retrospective study was collected from the resort clinic of Wanlong Ski Resort in Chongli during ski season 2018-2019. Wanlong Ski



1  
2  
3  
4 89 Resort is a destination ski resort in Northern China, which has various terrain  
5  
6 90 and the largest number of annual visits. The resort clinic is staffed by a  
7  
8  
9 91 registered general practitioner and a nurse, and is responsible for the primary  
10  
11 92 care of all injured visitors, whether self-present or sent by patrols; it is also  
12  
13  
14 93 responsible for treating mild injury, transferring patients to local hospital,  
15  
16  
17 94 carrying out basic life support for life-threatening injuries. The season of 2018-  
18  
19 95 2019 in Wanlong Ski Resort lasted for 158 days, from 2018/11/1-2019/4/7. A  
20  
21 96 total of 388606 visits (379503 skier days) were recorded.

22  
23  
24 97 Besides patient's information of sex and age, we also recorded equipment,  
25  
26  
27 98 skill level, the date and time of injury, the cause of injury, the slope difficulty  
28  
29  
30 99 and the injured body part. Equipment was classified into skis and  
31  
32  
33 100 snowboards. Special equipment, such as cross-country skis, skiboards, was  
34  
35 101 rare in China and not seen in recorded injured people. According to self-  
36  
37  
38 102 reported years of participation in skiing and snowboarding, patients were  
39  
40 103 classified as beginner (first season), medium (1-5 years), advanced (5-10  
41  
42 104 years) and expert ( $\geq 10$  years). The date of injury was divided into weekdays  
43  
44 105 and weekends/holidays according to the Chinese government holiday  
45  
46  
47 106 arrangement. The business hour of Wanlong Ski Resort is 8:00-16:00, so we  
48  
49 107 split the time of injury into 4 periods with 2 hours each, morning (first 2 hours  
50  
51 108 of business), noon, afternoon and late afternoon (last 2 hours of business).  
52  
53  
54 109 According to the subjective description of injury scene, we summarized 2  
55  
56  
57 110 types of causes of injury: not involving others, defined as falling or crashing  
58  
59  
60

1  
2  
3  
4 111 without any body contact with others; and involving others, defined as  
5  
6 112 crashing involving 2 or more people. The slope difficulty was categorized into  
7  
8  
9 113 beginner trail, medium trail and advanced trail according to the official data of  
10  
11 114 slope inclination angle. Injured body parts were categorized into the following  
12  
13  
14 115 4 anatomical body regions: (1) head/cervical, (2) torso, (3) upper extremity,  
15  
16  
17 116 and (4) lower extremity. Acromioclavicular joint injuries were classified as  
18  
19 117 upper limb injury, while other clavicle injuries were classified as torso injuries.<sup>6</sup>  
20  
21  
22 118 Injuries involving gluteal region were classified as torso injury. Whether  
23  
24 119 patients have multi-part injuries was also recorded, while each injured body  
25  
26  
27 120 part was counted in one of the above groups. The relationship between  
28  
29  
30 121 injured body part and sex, age, equipment and cause of injury was further  
31  
32  
33 122 determined by subgroup analysis.

34  
35 123 This study was approved by Peking University Third Hospital Medical  
36  
37 124 Science Research Ethics Committee. Informed consent was waived  
38  
39  
40 125 considering that the study was epidemiological and anonymous.

#### 41 42 43 126 Statistical analysis

44  
45 127 All statistical analysis was performed with SPSS (v 24.0; IBM Corp).  
46  
47  
48 128 Continuous variables were presented as mean and standard deviations, while  
49  
50  
51 129 categorical data were presented with frequency count and percentages. To do  
52  
53  
54 130 comparison between subgroups, Chi-squared test was used for categorical  
55  
56 131 variables and student t test was used for continuous variables. When there is  
57  
58  
59  
60

1  
2  
3  
4 132 missing data, the available case was analyzed to determine difference  
5  
6 133 between groups.  $P < 0.05$  was considered to indicate statistical significance.  
7  
8

### 9 134 3. Results

10  
11 135 During the study period, there were 388, 606 visits (379, 503 skier days)  
12  
13  
14 136 and 753 cases of injury recorded in Wanlong Ski Resort. The estimated  
15  
16  
17 137 incidence of injury was 1.98 per 1000 skier days.  
18

#### 19 138 Features of injury

20  
21  
22 139 The mean age of injured visitors was  $32.5 \pm 12.9$  years (range 3-73 years).  
23  
24 140 Pediatric patients under 15 years old took up 9.3%, while senior patients (over  
25  
26  
27 141 the age of 60) took up 3.0% of all injured population. The number of males  
28  
29  
30 142 was twice as females. Among these injuries, 453 cases (60.2%) were  
31  
32  
33 143 associated with skiing. Table 1 shows more detailed demographic and sport-  
34  
35 144 related profiles of these injuries.  
36

37  
38 145 The season of 2018-2019 in Wanlong Ski Resort consisted of 107  
39  
40 146 weekdays and 51 weekends/holidays according to the Chinese government  
41  
42  
43 147 arrangement. The average daily number of injuries was 3.38 on weekdays  
44  
45  
46 148 and 7.65 on weekends/holidays. A peak of pediatric cases was noted in  
47  
48 149 January and February (Figure 1). Within a day, the percentage of injury  
49  
50  
51 150 occurred in morning, noon, afternoon and late afternoon was 9.7%, 31.6%,  
52  
53 151 22.0% and 36.7% respectively.  
54  
55  
56  
57  
58  
59  
60

1  
2  
3  
4 152 Accidents not involving other skiers took up 67.9% of all injuries. The most  
5  
6 153 common injured body parts were upper (28.4%) and lower limbs (37.6%),  
7  
8  
9 154 followed by head and cervical injuries (13.1%).  
10

#### 11 155 Injury pattern in subgroups

12  
13  
14 156 The mean age of skiers was  $35.1 \pm 14.5$  years, whereas the mean age of  
15  
16  
17 157 snowboarders was  $29.0 \pm 8.9$  years ( $p < 0.01$ ). There was no significant  
18  
19  
20 158 difference in the sex profile between skiers and snowboarders.

21  
22 159 The injured body parts showed different patterns between skiers and  
23  
24 160 snowboarders. More than half of the skier patients sustained lower extremity  
25  
26  
27 161 injuries, while the most common injury in snowboarders was upper extremity  
28  
29  
30 162 injury. Head and cervical injury was identified in 13.7% of skiers and 13.6% of  
31  
32  
33 163 snowboarders. Multipart injury took up 5.3% in skiers and 3.4% in  
34  
35 164 snowboarders (Table 2). The cause of injury was also found to be related with  
36  
37  
38 165 the injured body parts in both skiers and snowboarders. Head injury took up a  
39  
40  
41 166 significantly higher rate in accidents involving others. In skiers, lower extremity  
42  
43  
44 167 injury was most common no matter whether the accidents involved others or  
45  
46  
47 168 not. However, the rate of lower extremity was significantly higher in accidents  
48  
49  
50 169 not involving others (Table 3). In snowboarders, head, cervical and torso  
51  
52  
53 170 injury took up a greater portion in accidents involving others (Table 4). The  
54  
55  
56 171 correlation between age, sex, skill level and injured body parts was not  
57  
58  
59 172 significant. (Supplementary Tables 1-6)  
60

1  
2  
3  
4 174 4. Discussion

5  
6 175 We found that the incidence of sports injury of Chinese recreational skiing  
7  
8  
9 176 and snowboarding population was 1.98 per 1000 skier days, which was  
10  
11 177 comparable to reported incidence of 0.5-3.7 per 1000 skier days in European  
12  
13  
14 178 and North American countries in recent years.<sup>1,7-9</sup> According to the  
15  
16  
17 179 government report, the total number of visits in ski resorts in Chongli hit nearly  
18  
19  
20 180 1 million in the 2018-19 ski season, which means an estimated number of  
21  
22 181 2,000 sports injuries in one season if such finding is extrapolated to the whole  
23  
24  
25 182 region. Therefore, a better understanding of injury pattern in Chinese  
26  
27 183 population will guide the reform of local health care facility to deal with the  
28  
29  
30 184 increasing number of participants in snow sports.

31  
32 185 The mean age of injured visitors was 32.5±12.9 years (range 3-73 years).  
33  
34  
35 186 9.3% of the injured population were younger than 15 years old. In china,  
36  
37  
38 187 winter vacation for students last for about 4 weeks around Chinese New  
39  
40  
41 188 Year. We found that sports injury in teenagers peaked in January and  
42  
43 189 February, and took up nearly 15% of all injuries occurred in these two  
44  
45  
46 190 months. The incidence of ski injury was reported higher in teenagers than in  
47  
48  
49 191 adults.<sup>10</sup> As more young people participate in these activities, an increase of  
50  
51 192 pediatric patients of snow sports injury will be seen in the future.

52  
53 193 Previous studies found female skiers are more susceptible to lower  
54  
55  
56 194 extremity injury, especially knee injuries, with nearly 50% of injured females  
57  
58  
59 195 suffer from knee injury.<sup>11</sup> The present study found lower extremity was the  
60

1  
2  
3  
4 196 most common injured body part in female skiers. However, there was no  
5  
6 197 significant difference in injured body parts between males and females in  
7  
8  
9 198 both skiers and snowboarders. Paolo G et al.<sup>12</sup> found that men experienced  
10  
11 199 more severe injuries than women, which may result from higher speed,  
12  
13  
14 200 body weight and trail difficulty in men.

17 201 Snowboarders accounted for nearly 40% of the injured population in the  
18  
19 202 latest season. Based on the previously published data, an increase of the  
20  
21 203 percentage of snowboarders in total and injured winter sport population has  
22  
23 204 been noticed.<sup>7,13</sup> This young sport appeals to more young people and at the  
24  
25 205 same time, reshapes the injury profile. In a study conducted in Big Sky area in  
26  
27 206 United States, snowboarders took up 42.8% of injured visitors in the 2009-  
28  
29 207 2010 season, while between 1995 and 2000 only 23.0% of injured people  
30  
31 208 were snowboarders.<sup>14</sup> Many studies reported that snowboarders had  
32  
33 209 significantly more injuries to the head, spine and upper extremity when  
34  
35 210 compared with skiers, whereas skiers sustained significantly more lower  
36  
37 211 extremity injuries.<sup>7,14,15</sup> The present study revealed the same patterns, with  
38  
39 212 higher rates of head, upper extremity injuries in snowboarders, and lower  
40  
41 213 rates of lower extremity injuries. In a study comparing injury severity in  
42  
43 214 different sports, the authors reported that the percentage of mild, moderate  
44  
45 215 and severe injuries in skiing were 41%, 44% and 15% respectively, while the  
46  
47 216 percentage in snowboarding were 34%, 53% and 13%.<sup>9</sup> Maat SC et al.

1  
2  
3  
4 217 <sup>15</sup>reported that skiers were more seriously injured with Injury Severity Scale  
5  
6 218 (ISS) higher than 9.  
7  
8

9 219 Beginners and medium level skiers (63.5%) and snowboarders (81.4%)  
10  
11 220 made up the majority of injured visitors. In a study involving 19, 539 injured  
12  
13 221 snowboarders in Japan, proportions of the trunk and multiple injuries were  
14  
15 222 found to increase with higher skill level; the injury severity was also found to  
16  
17 223 increase with skill level.<sup>16</sup> Another study found no relationship between skill  
18  
19 224 level and injury severity in skiing and snowboarding population once  
20  
21 225 unconscious patients (who cannot report their skill level) were ruled out.<sup>13</sup>  
22  
23  
24  
25  
26

27 226 In our study, the rate of injures not involving others was 67.9%, which is  
28  
29 227 lower than the reported rate on Austrian ski slopes.<sup>3</sup> The difference are  
30  
31 228 likely attributed to the higher density of skiers/snowboarders on the slope in  
32  
33 229 China, which is implied by the fact that the rate of crash accident was  
34  
35 230 extremely high on medium trails (See Supplementary Table 7). Yet, no  
36  
37 231 available studies provide conclusive evidence of the influence factors of  
38  
39 232 self-inflicted and crash injury rate.<sup>17</sup>  
40  
41  
42  
43  
44

45 233 The cause of injury was also found to be related with the injured body  
46  
47 234 parts in both skiers and snowboarders. Head injury took up a significantly  
48  
49 235 more portion in accidents involving others. Sport-specific injuries, such as  
50  
51 236 shoulder injury in snowboarding and knee injury in skiing,<sup>7</sup> were more  
52  
53 237 frequent in accidents not involving others. These findings can be attributed  
54  
55  
56  
57  
58  
59  
60

1  
2  
3  
4 238 to different injury mechanism, with non-contact injury often causing ligament  
5  
6 239 and tendon tear, contact injury causing bony injury and concussion.<sup>18</sup>  
7  
8

9 240 From an epidemiological view, the present study provides strategies that  
10  
11 241 can guide the restructure of local hospital and unload the burden in winter  
12  
13 242 season. First, to establish pediatric orthopedic department to cope with the  
14  
15 243 pediatric patients who take up nearly 10% of the whole injury population,  
16  
17 244 especially the surge during winter vacation in China. Second, to establish  
18  
19 245 department of neurosurgery and department of oral and maxillofacial surgery  
20  
21 246 to deal with the head and face injury, which took up to 13% of all injuries.  
22  
23 247 Third, to rearrange the worktime schedule according to the time-related “tide”  
24  
25 248 of winter sports injury to increase effectiveness with limited manpower. For  
26  
27 249 example, change weekends into work days and set other rest days in winter  
28  
29 250 season to cope with the traumatic cases in weekend which are twice as many  
30  
31 251 as in weekdays. Fourth, intensive care unit is crucial to manage severe  
32  
33 252 injuries as the population at higher risk of severe injuries, including  
34  
35 253 snowboarders, higher skill level and young participant, are growing bigger.  
36  
37 254 Fifth, to build up communication and cooperation network with nearby ski  
38  
39 255 resorts to allow access to critical patient’s information in advance and guide  
40  
41 256 prehospital care. Although the present study did not provide information about  
42  
43 257 injury severity and number of patients who need transfer and further  
44  
45 258 treatment, up to 60% of injured skiers and snowboarders seen in resort clinic  
46  
47 259 require transfer to hospital based on existing literature.<sup>9</sup> Up to now, the local  
48  
49  
50  
51  
52  
53  
54  
55  
56  
57  
58  
59  
60



1  
2  
3  
4 260 hospital in Chongli has reinforced its orthopedics and sports medicine  
5  
6 261 department by seeking cooperation with superior hospitals in Beijing. An  
7  
8  
9 262 evidence-based restructure of local hospital may increase the accessibility to  
10  
11 263 health care for injured skiers and snowboarders in nearby ski resorts.

12  
13  
14 264 Several limitations exist in this study. First, the severity of injury and  
15  
16 265 accurate diagnosis were not recorded, patients were not followed up for their  
17  
18 266 prognosis. Second, although medical providers in ski resort have collected  
19  
20 267 injury cases as through as possible, there were still patients who went to local  
21  
22 268 or superior hospitals directly, or did not receive any type of medical help for  
23  
24 269 mild injuries. In this case, the incidence of injury may be underestimated.  
25  
26 270 Additionally, the injury severity and number of patients who needed transfer  
27  
28 271 was incomplete, so we were unable to estimate the burden of local hospital in  
29  
30 272 skiing season. Currently, we are conducting a large-scale survey on the  
31  
32 273 demography of Chinese winter sports participants, and a prospective research  
33  
34 274 of winter sports injury in skiing population in China to fill the gap. The  
35  
36 275 effectiveness of hospital restructure will be reported as well.

#### 37 276 5. Patient and public involvement

38  
39 277 It was not appropriate to involve patients or the public in the design, or  
40  
41 278 conduct, or reporting, or dissemination plans of our research.

#### 42 279 6. Acknowledgement

43  
44 280 The medical director of Wanlong Ski Resort, Zhang Jinwei, provided help in  
45  
46 281 the collection of injury data.

1  
2  
3  
4 282 7. Funding

5  
6 283 This work was supported by the National Key Research and Development  
7  
8  
9 284 Program of China [2018YFF0301100].

10  
11 285 8. Conflicts of interest

12  
13  
14 286 The author states no conflicts of interest.

15  
16  
17 287 9. Author Contributions

18  
19 288 Chen Nayun designed the study, carried out the data analysis and drafted  
20  
21  
22 289 the manuscript. Yang Yuping carried out the design of patient information  
23  
24  
25 290 registration chart, and helped to draft the manuscript. Jiang Yanfang helped to  
26  
27  
28 291 connect with relevant staffs in Wanlong Ski Resort and revise the manuscript.  
29  
30 292 Ao Yingfang conceived of the study, and participated in its design.

31  
32 293 10. Data availability statement

33  
34  
35 294 The data in the present study is deidentified participant data which are  
36  
37  
38 295 available upon reasonable request. Please contact the first author for  
39  
40 296 permission to reuse the original data. Email: albert\_west@163.com

41  
42  
43 297 11. Reference

- 44  
45 298 1. Ekeland A, Johnson RJ, Shealy J, Senner V, Dean SW. Skiing and  
46  
47  
48 299 boarding injuries on Norwegian slopes during two winter seasons.  
49  
50  
51 300 Journal of ASTM International. 2010;7(4).
- 52  
53 301 2. Castellani C, Singer G, Eibisberger M, et al. An epidemiologic analysis  
54  
55  
56 302 of winter sport accidents on ski slopes comparing two seasons. *J Sports*  
57  
58 303 *Med Phys Fitness*. 2019;59(4):648-654.

- 1  
2  
3  
4 304 3. Ruedl G, Philippe M, Sommersacher R, Dunnwald T, Kopp M, Burtscher  
5  
6 305 M. [Current incidence of accidents on Austrian ski slopes]. *Sportverletz*  
7  
8  
9 306 *Sportschaden*. 2014;28(4):183-187.
- 10  
11 307 4. Haaland B, Steenstrup SE, Bere T, Bahr R, Nordsletten L. Injury rate  
12  
13  
14 308 and injury patterns in FIS World Cup Alpine skiing (2006-2015): have the  
15  
16  
17 309 new ski regulations made an impact? *Br J Sports Med*. 2016;50(1):32-  
18  
19 310 36.
- 20  
21  
22 311 5. Soligard T, Palmer D, Steffen K, et al. Sports injury and illness incidence  
23  
24 312 in the PyeongChang 2018 Olympic Winter Games: a prospective study  
25  
26  
27 313 of 2914 athletes from 92 countries. *Br J Sports Med*. 2019;53(17):1085-  
28  
29 314 1092.
- 30  
31  
32 315 6. Asadollahi S, Bucknill A. Acute medial clavicle fracture in adults: a  
33  
34  
35 316 systematic review of demographics, clinical features and treatment  
36  
37 317 outcomes in 220 patients. *J Orthop Traumatol*. 2019;20(1):24.
- 38  
39  
40 318 7. Kim S, Endres NK, Johnson RJ, Ettlinger CF, Shealy JE. Snowboarding  
41  
42  
43 319 injuries: trends over time and comparisons with alpine skiing injuries. *Am*  
44  
45 320 *J Sports Med*. 2012;40(4):770-776.
- 46  
47  
48 321 8. Langran M, Selvaraj S. Snow sports injuries in Scotland: a case-control  
49  
50 322 study. *Br J Sports Med*. 2002;36(2):135-140.
- 51  
52  
53 323 9. Stenroos A, Handolin L. Incidence of Recreational Alpine Skiing and  
54  
55  
56 324 Snowboarding Injuries: Six Years Experience in the Largest Ski Resort  
57  
58 325 in Finland. *Scand J Surg*. 2015;104(2):127-131.  
59  
60

- 1  
2  
3  
4 326 10. Provance AJ, Daoud AK, Tagawa A, Rhodes J. Pediatric and adolescent  
5  
6 327 injury in skiing. *Res Sports Med.* 2018;26(sup1):150-165.  
7  
8  
9 328 11. Ruedl G, Linortner I, Schranz A, et al. Distribution of injury mechanisms  
10  
11 329 and related factors in ACL-injured female carving skiers. *Knee Surg*  
12  
13 330 *Sports Traumatol Arthrosc.* 2009;17(11):1393-1398.  
14  
15  
16  
17 331 12. Girardi P, Braggion M, Sacco G, De Giorgi F, Corra S. Factors affecting  
18  
19 332 injury severity among recreational skiers and snowboarders: an  
20  
21  
22 333 epidemiology study. *Knee Surg Sports Traumatol Arthrosc.*  
23  
24 334 2010;18(12):1804-1809.  
25  
26  
27 335 13. Coury T, Napoli AM, Wilson M, Daniels J, Murray R, Milzman D. Injury  
28  
29 336 patterns in recreational alpine skiing and snowboarding at a  
30  
31  
32 337 mountainside clinic. *Wilderness Environ Med.* 2013;24(4):417-421.  
33  
34  
35 338 14. Wasden CC, McIntosh SE, Keith DS, McCowan C. An analysis of skiing  
36  
37 339 and snowboarding injuries on Utah slopes. *J Trauma.* 2009;67(5):1022-  
38  
39 340 1026.  
40  
41  
42  
43 341 15. Maat SC, Luppino FS, Schipper IB, Krijnen P, Bartlema KA. Injury  
44  
45 342 patterns after skiing and snowboarding sports accidents. *J Sports Med*  
46  
47 343 *Phys Fitness.* 2020;60(1):119-124.  
48  
49  
50 344 16. Ogawa H, Sumi H, Sumi Y, Shimizu K. Skill level-specific differences in  
51  
52 345 snowboarding-related injuries. *Am J Sports Med.* 2010;38(3):532-537.  
53  
54  
55  
56 346 17. Ruedl G, Kopp M, Burtscher M, Bauer R, Benedetto K. [Causes and  
57  
58 347 factors associated with collisions on ski slopes]. *Sportverletz*  
59  
60

348 *Sportschaden*. 2013;27(2):100-104.

349 18. Davey A, Endres NK, Johnson RJ, Shealy JE. Alpine Skiing Injuries.

350 *Sports Health*. 2019;11(1):18-26.

351

352

### 353 Tables and Figures

354 Table 1. Demographic and sport-related information of injured population

|                    | n (%)       |
|--------------------|-------------|
| <b>Sex</b>         |             |
| Male               | 475 (63.3%) |
| Female             | 278 (36.7%) |
| <b>Age</b>         |             |
| <15 years          | 68 (9.3%)   |
| 15-60 years        | 643 (87.7%) |
| >60 years          | 22 (3.0%)   |
| <b>Equipment</b>   |             |
| Ski                | 453 (60.6%) |
| Snowboard          | 294 (39.4%) |
| <b>Skill level</b> |             |
| Beginner           | 211 (29.5%) |

|                  |             |
|------------------|-------------|
| Medium           | 246 (34.0%) |
| Advanced         | 122(22.8%)  |
| Expert           | 64 (13.7%)  |
| Slope difficulty |             |
| Beginner trail   | 111(15.3%)  |
| Medium trail     | 206 (26.5%) |
| Advanced trail   | 425 (58.1%) |

355

356

Table 2. Details of injured skiers and snowboarders

|                    | Skiers<br>(n=453) | Snowboarders<br>(n=294) | P value |
|--------------------|-------------------|-------------------------|---------|
| Sex, n (%)         |                   |                         |         |
| Male               | 281 (63.3%)       | 184 (62.6%)             | 0.846   |
| Female             | 163` (36.7%)      | 110 (37.4%)             |         |
| Age, n (%)         |                   |                         |         |
| <15 years          | 44 (10.3%)        | 22 (7.5%)               | <0.01*  |
| 15-60 years        | 363 (84.6%)       | 270 (92.5%)             |         |
| >60 years          | 22 (5.1%)         | 0 (0%)                  |         |
| Skill level, n (%) |                   |                         |         |
| Beginner           | 110 (29.5%)       | 101 (37.5%)             | <0.01*  |
| Medium             | 127 (34.0%)       | 118 (43.9%)             |         |

|                          |             |             |        |
|--------------------------|-------------|-------------|--------|
| Advanced                 | 85 (22.8%)  | 37 (13.8%)  |        |
| Expert                   | 51 (13.7%)  | 13 (4.8%)   |        |
| Date of Injury, n (%)    |             |             |        |
| Weekdays                 | 223 (50.2%) | 134 (45.7%) | 0.232  |
| Weekends/Holidays        | 221 (49.8%) | 159 (54.3%) |        |
| Time of injury, n (%)    |             |             |        |
| Morning                  | 44 (10.1%)  | 28 (9.9%)   | 0.466  |
| Noon                     | 137 (31.6%) | 89 (31.3%)  |        |
| Afternoon                | 86 (19.8%)  | 69 (24.3%)  |        |
| Late afternoon           | 167 (38.5%) | 98 (34.5%)  |        |
| Slope difficulty, n (%)  |             |             |        |
| Beginner trail           | 67 (15.3%)  | 42 (14.4%)  | 0.868  |
| Medium trail             | 116 (26.5%) | 82 (28.2%)  |        |
| Advanced trail           | 254 (58.1%) | 167 (57.4%) |        |
| Cause of injury, n (%)   |             |             |        |
| Involving others         | 153 (32.5%) | 97 (30.6%)  | 0.680  |
| Not involving others     | 291 (67.5%) | 197 (69.4%) |        |
| Injured body part, n (%) |             |             |        |
| Head and cervical        | 57 (13.7%)  | 36 (13.6%)  | <0.01* |
| Torso                    | 83 (19.9%)  | 63 (23.8%)  |        |
| Upper extremity          | 79 (18.9%)  | 125 (47.2%) |        |
| Lower extremity          | 222 (53.2%) | 50 (18.9%)  |        |

|  |           |           |          |
|--|-----------|-----------|----------|
|  | Multipart | 22 (5.3%) | 9 (3.4%) |
|--|-----------|-----------|----------|

357

358

359

360 Table 3. The relationship between cause of injury and injured body part in

361 skiers

|                   | Injury not involving others<br>(n=291) | Injury involving others<br>(n=126) | P value |
|-------------------|----------------------------------------|------------------------------------|---------|
| Head and cervical | 21(7.2%)                               | 36(28.6%)                          | <0.01   |
| Torso             | 54(18.6%)                              | 29(23.0%)                          |         |
| Upper extremity   | 53(18.2%)                              | 26(20.6%)                          |         |
| Lower extremity   | 172(59.1%)                             | 50(49.7%)                          |         |
| Multipart injury  | 9(3.1%)                                | 13(10.3%)                          |         |

362

363 Table 4. The relationship between cause of injury and injured body part in

364 snowboarders

|                   | Injury not involving others<br>(n=197) | Injury involving others<br>(n=68) | P value |
|-------------------|----------------------------------------|-----------------------------------|---------|
| Head and cervical | 17(8.6%)                               | 19(27.9%)                         | <0.01   |
| Torso             | 39(19.8%)                              | 24(35.3%)                         |         |



|                  |            |           |
|------------------|------------|-----------|
| Upper extremity  | 107(54.3%) | 18(26.5%) |
| Lower extremity  | 37(18.8%)  | 13(19.1%) |
| Multipart injury | 3(1.5%)    | 6(8.8%)   |

---

365

366 Figure 1. Number of injury cases in different age group during the season of

367 2018-2019.

368

For peer review only

1  
2  
3  
4  
5  
6  
7  
8  
9  
10  
11  
12  
13  
14  
15  
16  
17  
18  
19  
20  
21  
22  
23  
24  
25  
26  
27  
28  
29  
30  
31  
32  
33  
34  
35  
36  
37  
38  
39  
40  
41  
42  
43  
44  
45  
46  
47  
48  
49  
50  
51  
52  
53  
54  
55  
56  
57  
58  
59  
60



Figure 1. Number of injury cases in differet age group during the season of 2018-2019.

Table 1. The relationship between sex and injured body part in skiers

|                   | Male<br>(n=260) | Female<br>(n=158) | P value |
|-------------------|-----------------|-------------------|---------|
| Head and cervical | 32(12.3%)       | 25(15.8%)         | 0.29    |
| Torso             | 58(22.3%)       | 24(15.2%)         |         |
| Upper extremity   | 51(19.6%)       | 28(17.7%)         |         |
| Lower extremity   | 131(50.4%)      | 91(57.6%)         |         |
| Multipart injury  | 12(4.6%)        | 10(6.3%)          |         |

Table 2. The relationship between sex and injured body part in snowboarders

|                   | Male<br>(n=158) | Female<br>(n=107) | P value |
|-------------------|-----------------|-------------------|---------|
| Head and cervical | 21(13.3%)       | 15(14.0%)         | 0.63    |
| Torso             | 42(25.6%)       | 21(19.6%)         |         |
| Upper extremity   | 74(46.8%)       | 51(47.7%)         |         |
| Lower extremity   | 26(16.5%)       | 24(22.4%)         |         |
| Multipart injury  | 5(3.2%)         | 4(3.7%)           |         |

Table 3. The relationship between age and injured body part in skiers

|                   | Teenager<br>(n=52) | Adult<br>(n=329) | Elderly<br>(n=22) | P value |
|-------------------|--------------------|------------------|-------------------|---------|
| Head and cervical | 15(28.8%)          | 39(11.9%)        | 2(9.1%)           | 0.14    |
| Torso             | 6(11.5%)           | 70(21.3%)        | 4(18.2%)          |         |
| Upper extremity   | 12(23.1%)          | 57(17.3%)        | 8(36.4%)          |         |
| Lower extremity   | 22(42.3%)          | 179(54.4%)       | 11(50%)           |         |
| Multipart injury  | 3(5.8%)            | 16(4.9%)         | 3(13.6%)          |         |

Table 4. The relationship between age and injured body part in snowboarders

|                   | Teenager<br>(n=26) | Adult<br>(n=238) | Elderly<br>(n=0) | P value |
|-------------------|--------------------|------------------|------------------|---------|
| Head and cervical | 6(23.1%)           | 30(12.6%)        | 0                | 0.21    |
| Torso             | 4(15.4%)           | 59(25.2%)        | 0                |         |
| Upper extremity   | 15(57.7%)          | 109(45.8%)       | 0                |         |
| Lower extremity   | 2(7.7%)            | 48(20.2%)        | 0                |         |
| Multipart injury  | 1(3.8%)            | 8(3.4%)          | 0                |         |

Table 5. The relationship between skill level and injured body part in skiers

|                   | Beginner<br>(n=106) | Medium<br>(n=118) | Advanced<br>(n=79) | Expert<br>(n=49) | P value |
|-------------------|---------------------|-------------------|--------------------|------------------|---------|
| Head and cervical | 13(28.8%)           | 12(11.9%)         | 11(9.1%)           | 5(%)             | 0.19    |
| Torso             | 18(11.5%)           | 27(21.3%)         | 16(18.2%)          | 10(%)            |         |
| Upper extremity   | 22(23.1%)           | 18(17.3%)         | 15(36.4%)          | 13(%)            |         |
| Lower extremity   | 54(42.3%)           | 164(54.4%)        | 48(50%)            | 24(%)            |         |
| Multipart injury  | 2(5.8%)             | 4(4.9%)           | 9(13.6%)           | 3(%)             |         |

Table 6. The relationship between skill level and injured body part in snowboarders

|                   | Beginner<br>(n=93) | Medium<br>(n=109) | Advance<br>(n=36) | Expert<br>(n=11) | P<br>value |
|-------------------|--------------------|-------------------|-------------------|------------------|------------|
| Head and cervical | 15(23.1%)          | 11(12.6%)         | 5                 | 1                | 0.32       |
| Torso             | 20(15.4%)          | 27(25.2%)         | 10                | 2                |            |
| Upper extremity   | 46(57.7%)          | 51(45.8%)         | 14                | 7                |            |
| Lower extremity   | 14(7.7%)           | 26(20.2%)         | 8                 | 8                |            |

1  
2  
3  
4 Multipart injury 2(3.8%) 6(3.4%) 1 0  
5  
6  
7

8 Table 7. Cause of injury and slope difficulty  
9

|                | Self-inflicted<br>(n=486) | Crash<br>(n=226) | P value |
|----------------|---------------------------|------------------|---------|
| Beginner trail | 93                        | 18               | <0.01*  |
| Medium trail   | 103                       | 87               |         |
| Advanced trail | 292                       | 121              |         |

STROBE Statement—Checklist of items that should be included in reports of *cohort studies*

|                              | Item No | Recommendation                                                                                                                                                                                    | Page No |
|------------------------------|---------|---------------------------------------------------------------------------------------------------------------------------------------------------------------------------------------------------|---------|
| <b>Title and abstract</b>    | 1       | (a) Indicate the study's design with a commonly used term in the title or the abstract                                                                                                            | 1       |
|                              |         | (b) Provide in the abstract an informative and balanced summary of what was done and what was found                                                                                               | 2       |
| <b>Introduction</b>          |         |                                                                                                                                                                                                   |         |
| Background/rationale         | 2       | Explain the scientific background and rationale for the investigation being reported                                                                                                              | 3       |
| Objectives                   | 3       | State specific objectives, including any prespecified hypotheses                                                                                                                                  | 3       |
| <b>Methods</b>               |         |                                                                                                                                                                                                   |         |
| Study design                 | 4       | Present key elements of study design early in the paper                                                                                                                                           | 5       |
| Setting                      | 5       | Describe the setting, locations, and relevant dates, including periods of recruitment, exposure, follow-up, and data collection                                                                   | 5       |
| Participants                 | 6       | (a) Give the eligibility criteria, and the sources and methods of selection of participants. Describe methods of follow-up                                                                        | 5       |
|                              |         | (b) For matched studies, give matching criteria and number of exposed and unexposed                                                                                                               | NA      |
| Variables                    | 7       | Clearly define all outcomes, exposures, predictors, potential confounders, and effect modifiers. Give diagnostic criteria, if applicable                                                          | 5       |
| Data sources/<br>measurement | 8*      | For each variable of interest, give sources of data and details of methods of assessment (measurement). Describe comparability of assessment methods if there is more than one group              | 6       |
| Bias                         | 9       | Describe any efforts to address potential sources of bias                                                                                                                                         | NA      |
| Study size                   | 10      | Explain how the study size was arrived at                                                                                                                                                         | NA      |
| Quantitative variables       | 11      | Explain how quantitative variables were handled in the analyses. If applicable, describe which groupings were chosen and why                                                                      | NA      |
| Statistical methods          | 12      | (a) Describe all statistical methods, including those used to control for confounding                                                                                                             | 6       |
|                              |         | (b) Describe any methods used to examine subgroups and interactions                                                                                                                               | NA      |
|                              |         | (c) Explain how missing data were addressed                                                                                                                                                       | 6       |
|                              |         | (d) If applicable, explain how loss to follow-up was addressed                                                                                                                                    | NA      |
|                              |         | (e) Describe any sensitivity analyses                                                                                                                                                             | NA      |
| <b>Results</b>               |         |                                                                                                                                                                                                   |         |
| Participants                 | 13*     | (a) Report numbers of individuals at each stage of study—eg numbers potentially eligible, examined for eligibility, confirmed eligible, included in the study, completing follow-up, and analysed | 7       |
|                              |         | (b) Give reasons for non-participation at each stage                                                                                                                                              | NA      |
|                              |         | (c) Consider use of a flow diagram                                                                                                                                                                | NA      |
| Descriptive data             | 14*     | (a) Give characteristics of study participants (eg demographic, clinical, social) and information on exposures and potential confounders                                                          | 7       |
|                              |         | (b) Indicate number of participants with missing data for each variable of interest                                                                                                               | NA      |
|                              |         | (c) Summarise follow-up time (eg, average and total amount)                                                                                                                                       | NA      |
| Outcome data                 | 15*     | Report numbers of outcome events or summary measures over time                                                                                                                                    | 7-8     |

|    |                          |    |                                                                                                                                                                                                              |     |
|----|--------------------------|----|--------------------------------------------------------------------------------------------------------------------------------------------------------------------------------------------------------------|-----|
| 1  | Main results             | 16 | (a) Give unadjusted estimates and, if applicable, confounder-adjusted estimates and their precision (eg, 95% confidence interval). Make clear which confounders were adjusted for and why they were included | 7-8 |
| 2  |                          |    | (b) Report category boundaries when continuous variables were categorized                                                                                                                                    | NA  |
| 3  |                          |    | (c) If relevant, consider translating estimates of relative risk into absolute risk for a meaningful time period                                                                                             | NA  |
| 4  |                          |    |                                                                                                                                                                                                              |     |
| 5  |                          |    |                                                                                                                                                                                                              |     |
| 6  |                          |    |                                                                                                                                                                                                              |     |
| 7  |                          |    |                                                                                                                                                                                                              |     |
| 8  |                          |    |                                                                                                                                                                                                              |     |
| 9  | Other analyses           | 17 | Report other analyses done—eg analyses of subgroups and interactions, and sensitivity analyses                                                                                                               | NA  |
| 10 |                          |    |                                                                                                                                                                                                              |     |
| 11 | <b>Discussion</b>        |    |                                                                                                                                                                                                              |     |
| 12 |                          |    |                                                                                                                                                                                                              |     |
| 13 | Key results              | 18 | Summarise key results with reference to study objectives                                                                                                                                                     | 9   |
| 14 | Limitations              | 19 | Discuss limitations of the study, taking into account sources of potential bias or imprecision. Discuss both direction and magnitude of any potential bias                                                   | 13  |
| 15 |                          |    |                                                                                                                                                                                                              |     |
| 16 | Interpretation           | 20 | Give a cautious overall interpretation of results considering objectives, limitations, multiplicity of analyses, results from similar studies, and other relevant evidence                                   | 13  |
| 17 |                          |    |                                                                                                                                                                                                              |     |
| 18 |                          |    |                                                                                                                                                                                                              |     |
| 19 | Generalisability         | 21 | Discuss the generalisability (external validity) of the study results                                                                                                                                        | NA  |
| 20 |                          |    |                                                                                                                                                                                                              |     |
| 21 | <b>Other information</b> |    |                                                                                                                                                                                                              |     |
| 22 | Funding                  | 22 | Give the source of funding and the role of the funders for the present study and, if applicable, for the original study on which the present article is based                                                | 13  |
| 23 |                          |    |                                                                                                                                                                                                              |     |
| 24 |                          |    |                                                                                                                                                                                                              |     |

\*Give information separately for exposed and unexposed groups.

**Note:** An Explanation and Elaboration article discusses each checklist item and gives methodological background and published examples of transparent reporting. The STROBE checklist is best used in conjunction with this article (freely available on the Web sites of PLoS Medicine at <http://www.plosmedicine.org/>, Annals of Internal Medicine at <http://www.annals.org/>, and Epidemiology at <http://www.epidem.com/>). Information on the STROBE Initiative is available at <http://www.strobe-statement.org>.
