# Supplementary material for: Injury patterns in a large-scale ski resort in the host city of 2022 Winter Olympic Games: a retrospective cross-sectional study
Source: PubMed Central journal article supplement — BMJ Open. 2020 Nov 23;10(11):e037834. doi: 10.1136/bmjopen-2020-037834 (PMC7684805; doi:10.1136/bmjopen-2020-037834), 2020-11-23
Supplement: bmjopen-2020-037834supp001.pdf [file bmjopen-2020-037834supp001.pdf]

Table 1. The relationship between sex and injured body part in skiers

|                   | Male<br>(n=260) | Female<br>(n=158) | P value |
|-------------------|-----------------|-------------------|---------|
| Head and cervical | 32(12.3%)       | 25(15.8%)         | 0.29    |
| Torso             | 58(22.3%)       | 24(15.2%)         |         |
| Upper extremity   | 51(19.6%)       | 28(17.7%)         |         |
| Lower extremity   | 131(50.4%)      | 91(57.6%)         |         |
| Multipart injury  | 12(4.6%)        | 10(6.3%)          |         |

Table 2. The relationship between sex and injured body part in snowboarders

|                   | Male<br>(n=158) | Female<br>(n=107) | P value |
|-------------------|-----------------|-------------------|---------|
| Head and cervical | 21(13.3%)       | 15(14.0%)         | 0.63    |
| Torso             | 42(25.6%)       | 21(19.6%)         |         |
| Upper extremity   | 74(46.8%)       | 51(47.7%)         |         |
| Lower extremity   | 26(16.5%)       | 24(22.4%)         |         |
| Multipart injury  | 5(3.2%)         | 4(3.7%)           |         |

Table 3. The relationship between age and injured body part in skiers

|                   | Teenager<br>(n=52) | Adult<br>(n=329) | Elderly<br>(n=22) | P value |
|-------------------|--------------------|------------------|-------------------|---------|
| Head and cervical | 15(28.8%)          | 39(11.9%)        | 2(9.1%)           | 0.14    |
| Torso             | 6(11.5%)           | 70(21.3%)        | 4(18.2%)          |         |
| Upper extremity   | 12(23.1%)          | 57(17.3%)        | 8(36.4%)          |         |
| Lower extremity   | 22(42.3%)          | 179(54.4%)       | 11(50%)           |         |
| Multipart injury  | 3(5.8%)            | 16(4.9%)         | 3(13.6%)          |         |

Table 4. The relationship between age and injured body part in

| snowboarders      |                    |                  |                  |         |
|-------------------|--------------------|------------------|------------------|---------|
|                   | Teenager<br>(n=26) | Adult<br>(n=238) | Elderly<br>(n=0) | P value |
| Head and cervical | 6(23.1%)           | 30(12.6%)        | 0                | 0.21    |
| Torso             | 4(15.4%)           | 59(25.2%)        | 0                |         |
| Upper extremity   | 15(57.7%)          | 109(45.8%)       | 0                |         |
| Lower extremity   | 2(7.7%)            | 48(20.2%)        | 0                |         |
| Multipart injury  | 1(3.8%)            | 8(3.4%)          | 0                |         |

Table 5. The relationship between skill level and injured body part in skiers

|                   | Beginner<br>(n=106) | Medium<br>(n=118) | Advanced<br>(n=79) | Expert<br>(n=49) | P value |
|-------------------|---------------------|-------------------|--------------------|------------------|---------|
| Head and cervical | 13(28.8%)           | 12(11.9%)         | 11(9.1%)           | 5(%)             | 0.19    |
| Torso             | 18(11.5%)           | 27(21.3%)         | 16(18.2%)          | 10(%)            |         |
| Upper extremity   | 22(23.1%)           | 18(17.3%)         | 15(36.4%)          | 13(%)            |         |
| Lower extremity   | 54(42.3%)           | 164(54.4%)        | 48(50%)            | 24(%)            |         |
| Multipart injury  | 2(5.8%)             | 4(4.9%)           | 9(13.6%)           | 3(%)             |         |

Table 6. The relationship between skill level and injured body part in

| snowboarders      |                    |                   |                   |                  |            |
|-------------------|--------------------|-------------------|-------------------|------------------|------------|
|                   | Beginner<br>(n=93) | Medium<br>(n=109) | Advance<br>(n=36) | Expert<br>(n=11) | P<br>value |
| Head and cervical | 15(23.1%)          | 11(12.6%)         | 5                 | 1                | 0.32       |
| Torso             | 20(15.4%)          | 27(25.2%)         | 10                | 2                |            |
| Upper extremity   | 46(57.7%)          | 51(45.8%)         | 14                | 7                |            |
| Lower extremity   | 14(7.7%)           | 26(20.2%)         | 8                 | 8                |            |

---

|                  |         |         |   |   |
|------------------|---------|---------|---|---|
| Multipart injury | 2(3.8%) | 6(3.4%) | 1 | 0 |
|------------------|---------|---------|---|---|

---

Table 7. Cause of injury and slope difficulty

|                | Self-inflicted<br>(n=486) | Crash<br>(n=226) | P value |
|----------------|---------------------------|------------------|---------|
| Beginner trail | 93                        | 18               | <0.01*  |
| Medium trail   | 103                       | 87               |         |
| Advanced trail | 292                       | 121              |         |
